1 **Spatiotemporal changes in genetic diversity and structure of a recent fish invasion in**  
2 **eastern North America**

3  
4 Thaïs A. Bernos (ORCID ID: 0000-0002-4884-4275)<sup>1,2</sup>, Sunčica Avlijaš<sup>3,4</sup> (ORCID ID: 0000-  
5 0002-2526-2707), Jaclyn Hill (ORCID ID: 0000-0003-0703-3772)<sup>5</sup>, Olivier Morissette (ORCID  
6 ID: 0000-0002-5037-9093)<sup>6</sup>, Anthony Ricciardi (ORCID ID: 0000-0003-1492-0054)<sup>3</sup>, Nicholas  
7 E. Mandrak (ORCID ID: 0000-0001-8335-9681)<sup>1</sup>, Kenneth M. Jeffries (ORCID ID: 0000-0002-  
8 7466-1915)<sup>7</sup>

9  
10 <sup>1</sup>Department of Ecology and Evolutionary Biology, University of Toronto, Toronto, ON, Canada

11 <sup>2</sup> Department of Biological Sciences, University of Toronto Scarborough, Scarborough, ON,  
12 Canada

13 <sup>3</sup>Redpath Museum, McGill University, Montreal, QC, Canada

14 <sup>4</sup> Department of Biology, McGill University, Montreal, QC, Canada

15 <sup>5</sup> Maurice Lamontagne Institute, Fisheries and Oceans Canada, Mont-Joli, QC, Canada

16 <sup>6</sup>Direction de l'expertise sur la faune aquatique, Ministère des Forêts, de la Faune et des Parcs,  
17 Québec, QC, Canada

18 <sup>7</sup> Department of Biological Sciences, University of Manitoba, Winnipeg, MB, Canada

19

20 **Corresponding author:** Thaïs A. Bernos (thais.bernos@utoronto.ca)

21 **Abstract**

22 Introduced and geographically expanding populations experience similar eco-evolutionary  
23 challenges, including founder events, genetic bottlenecks, and novel environments. Theory  
24 predicts that reduced genetic diversity resulting from such genetic phenomena limits the  
25 colonization success of introduced populations. We examined an invasive population of a  
26 Eurasian freshwater fish, Tench (*Tinca tinca*), that has been expanding geographically in eastern  
27 North America for three decades. Using genomic data, we evaluated evidence for single versus  
28 multiple introductions and the connectivity of the population across the entire range in which it  
29 has been spreading. Tench exhibited low levels of genetic diversity, a lack of marked population  
30 subdivision across time and space, and evidence of a recent genetic bottleneck. These results  
31 suggest that the invasion stemmed from a single introduction, consistent with the reported  
32 invasion history. Furthermore, the large genetic neighbourhood size and weak within-population  
33 genetic substructure suggest high connectivity across the invaded range, despite the large area  
34 occupied, and no evidence of substantial diminution of genetic diversity from the invasion core  
35 to the margins. As eradicating the species within a ~112 km radius would be necessary to  
36 prevent recolonization, eradicating Tench is likely not feasible at watershed—and possibly  
37 local—scales. Management should instead focus on reducing abundance in priority conservation  
38 areas to mitigate adverse impacts. Our study supports the argument that introduced populations  
39 can thrive despite recent bottlenecks and low levels of genetic diversity, and it suggests that  
40 landscape heterogeneity and population demographics can generate variability in spatial patterns  
41 of genetic diversity within a single range expansion.

42

43 **Keywords:** Landscape connectivity; Dispersal; Bottleneck; Range expansion; Fisheries

44 management; Tench

45

## 1 **Introduction**

2 Biological invasions and range expansions entail changes in population size across space and  
3 time. Following introduction to a new area, founding individuals typically carry only a fraction  
4 of the alleles present in their source population. This loss of genetic diversity, known as a genetic  
5 bottleneck, can increase inbreeding, reduce heterozygosity, and lessen the ability of introduced  
6 populations to adapt to novel environments (Chakraborty & Nei, 1977; Nei et al., 1975).  
7 Furthermore, when populations spread from restricted areas to larger regions, the number of  
8 individuals initially colonizing new habitats is likely to be limited; as a consequence, bottlenecks  
9 can occur sequentially on expanding margins (Peter & Slatkin, 2013, 2015). These serial founder  
10 events are believed to reduce the genetic diversity and the fitness of populations across space,  
11 thereby hindering their geographic spread into suitable habitat (Peischl et al. 2013; Peischl and  
12 Excoffier 2015). Yet, rather than suffering the fate of many small populations—i.e. dwindling  
13 abundance—some introduced populations expand geographically and demographically  
14 (Dlugosch & Parker, 2008; Uller & Leimu, 2011).

15  
16 Significant genetic bottlenecks are expected in populations resulting from the single introduction  
17 of a relatively small number of individuals, whereas when the number of founder individuals is  
18 large, introduced populations can retain the genetic diversity of the source population (Kan &  
19 Cassel-lundhagen, 2021; Michaelides et al., 2016). Multiple introductions (spatial or temporal)  
20 are also common, yet poorly documented, and can increase genetic diversity and population  
21 structure by adding individuals and introducing new genetic variants (Dlugosch & Parker, 2008;  
22 Roman & Darling, 2007; Snyder & Stepien, 2017; Uller & Leimu, 2011). As a result of large  
23 propagule sizes and multiple introductions, the consequences of bottlenecks on genetic diversity

24 are often modest and do not hinder the establishment of introduced species or their geographic  
25 expansion (Estoup et al., 2016; Roman & Darling, 2007).

26

27 During geographic expansions, the loss of genetic diversity from the core to the margin of the  
28 expanding range is mediated by dispersal (Ibrahim et al., 1996; Waters et al., 2013). In theory,  
29 genetic diversity losses should be exacerbated in less mobile species, owing to repetitive  
30 breeding between limited number of lineages at the expanding margin (Hallatschek & Nelson,  
31 2008; Oskar Hallatschek et al., 2007). In addition, when long-distance dispersal events are rare,  
32 marginal populations descending from a small number of founders are likely to suffer from the  
33 genetic consequences of bottlenecks (Gandhi et al., 2016). Alternatively, highly mobile species  
34 can retain more genetic diversity because dispersal within the expanded range will contribute  
35 genetic diversity to marginal populations (Birzu et al., 2019; Goodsman et al., 2014). While  
36 often investigated using simulations and mathematical models (Andrade-Restrepo et al., 2019;  
37 Klopstein et al., 2006; Peter & Slatkin, 2015), the outcomes of ongoing range expansion on  
38 spatial patterns of genetic diversity are not yet fully resolved empirically.

39

40 In natural populations, genetic interconnectedness is constrained by the distribution of suitable  
41 habitat and the presence of dispersal barriers. As a result, populations might expand faster in  
42 some directions than others (Samarasekera et al., 2012), and fast range expansions tend to retain  
43 higher levels of genetic diversity than slower ones (Goodsman et al., 2014). In particular, many  
44 populations exist in complex landscapes where environmental conditions (e.g. riverine flow,  
45 oceanic current) might bias the direction of dispersal and result in asymmetric gene flow (Grant  
46 et al., 2007; Lujan et al., 2020).

47

48 *A globally invasive fish, Tench, as a study system*

49 In parts of its native Eurasian range, the Tench (*Tinca tinca*) is a cypriniform fish of conservation  
50 concern; on other continents, it is an invasive species (Avlijas et al., 2018). In eastern North  
51 America, starting from an initial importation of approximately 30 individuals sourced from  
52 Germany and stocked in a Quebec farm pond, Tench was released into the Richelieu River some  
53 time between the late 1980's and early 1990s (Dumont et al., 2002) (Fig. 1). After an initial lag,  
54 the Tench population started growing and spreading. It was first detected in Lake Champlain in  
55 the early 2000s and subsequently dispersed towards southern Lake Champlain (southern front)  
56 and over 500 km of riverine habitat in the St Lawrence River (hereafter, the SLR) between Lake  
57 Ontario (western front) and Quebec City (north-eastern front) (Avlijas et al., 2018). Whether the  
58 Tench population resulted from a single introduction involving a handful of individuals has not  
59 been validated genetically; multiple introductions are often poorly documented, and cannot be  
60 ruled out as individuals of unknown origin have been found in another pond in the Laurentian  
61 Great Lakes watershed (Avlijas et al., 2018).

62

63 To date, the Tench population in eastern North America has been expanding without active  
64 management by local authorities (Avlijas et al., 2018). Detailed knowledge of levels of  
65 connectivity could inform decisions regarding interventions to manage the invasion. For  
66 example, if genomic data suggests low connectivity and patches of genetically similar  
67 individuals across the invaded range, targeted culling of individuals in patches at the margins of  
68 the invasion might best limit the expansion. Conversely, if there is widespread connectivity  
69 within the invaded region, eradication might not be feasible and, thus, managers might best focus

70 their efforts on preventing Tench dispersal to, or reducing their population density in, areas of  
71 special concern (e.g. wetlands, spawning beds) (Gandhi et al., 2016; Low et al., 2018). Finally,  
72 owing to uncertainties surrounding the levels of connectivity within the eastern North American  
73 population, the ability of Tench to disperse to new areas remains unknown.

74

#### 75 *Study objectives*

76 Here, we tested two contrasting hypotheses to characterize the invasion history of Tench in the  
77 region. The “bottleneck hypothesis” posits that a small number of individuals released in the  
78 Richelieu River founded the entire population. Alternatively, the “multiple-introduction  
79 hypothesis” posits that the establishment and geographic expansion of Tench resulted from more  
80 than one release event. These scenarios are characterized by contrasting levels of genetic  
81 diversity and population structure across time and space, as well as evidence, or lack thereof, for  
82 a recent bottleneck. Following conventional genomic analyses based on clustering and metrics of  
83 genetic differentiation, we computed individual- and population-based metrics of genetic  
84 diversity. To test for the occurrence of a recent bottleneck, we matched our empirical data to  
85 scenarios of bottlenecks generated using coalescent-based simulations.

86

87 We also employed powerful spatially informed population genomic approaches to test two  
88 hypotheses concerning the connectivity of the population within the invaded region. Under the  
89 “low-connectivity hypothesis”, individuals do not typically disperse over long geographic  
90 distances. If spread is constrained by landscape heterogeneity or dispersal capacity, the  
91 population might exhibit local patches of genetically similar individuals and small genetic  
92 neighbourhoods (area within which the impact of genetic drift on genetic diversity is less than

93 that of gene flow) (Wright, 1946). Alternatively, under the “high-connectivity hypothesis”,  
94 Tench are capable of extensive movement within the established range; effective gene flow  
95 across large distances will result in a genetically cohesive population unit across the invaded  
96 range, and large genetic neighbourhood size. Finally, genetic diversity metrics should vary as a  
97 function of connectivity. Specifically, if local numbers of breeding individuals are small due to  
98 their relative isolation, which increases with geographic or ecological distances, genetic diversity  
99 metrics will vary across the invaded range.

100

## 101 **Materials and methods**

102

### 103 **Data**

104 **Study system and sampling** - Tench were sampled across the invaded range in eastern North  
105 America (Figure 1), spanning southeastern Canada (SLR, Richelieu River, and one sample from  
106 Lake Ontario) and northern Vermont, U.S. (Lake Champlain). Tench were captured using a  
107 variety of methods, including electrofishers, gillnets, fyke nets, and seine nets, from 2016 to  
108 2019. The captured individuals were geolocated and samples for genetic analyses were collected  
109 in the form of tissue samples, preserved in 95% ethanol and held in -25°C freezers until  
110 extraction. DNA was extracted using Qiagen DNA extraction kits (Qiagen, Leusden,  
111 Netherlands). To capture spatial patterns of genetic variation across the invaded range and at  
112 finer geographic scales, we extracted DNA from a total of 345 samples collected throughout the  
113 known invaded range and quantified extracted samples with a Qubit (Thermofisher). We then  
114 sequenced those with DNA concentrations greater than 10 ng/ul (n=238). To further understand  
115 the demographic history of the population, we also extracted DNA from 40 archived fin clips



116 collected from individuals sampled in 2002, when the species was still geographically restricted  
117 to the Richelieu River. While the DNA was degraded for most of those fin clips, we were able to  
118 include 10 samples (hereafter referred to as the original samples) in the sequencing effort.

119

120 **Genomic data** - Restriction-site-associated DNA (RAD) libraries were prepared following a  
121 three-enzyme protocol (Bayona-Vásquez et al., 2019), with modifications described in detail  
122 elsewhere (Lujan et al., 2020). Briefly, the enzymes XbaI and EcoRI were used to digest the  
123 genome and NheI to separate adapter-dimers. Isolated fragments were 340-450 bp long, ensuring  
124 that the sequencing reads (61 bp) would be at least 280 bp from all other loci, thereby helping  
125 meet the assumption of unlinked loci for downstream analyses. Libraries were sequenced on the  
126 Illumina NextSeq500 Desktop sequencer v2 for 75 bp single-end reads (Illumina Inc., San  
127 Diego, CA, USA) at the University of Toronto Center of Analysis of Genome Evolution and  
128 Function (CAGEF). We demultiplexed the resulting sequences using bcl2fastq2 v2.20  
129 (Illumina). We then discarded low-quality reads and trimmed reads to 61 by removing  
130 heterogeneity spacers, restriction overhangs, and compensatory bases, using fastp v0.20 (Chen et  
131 al., 2018). We visualized sequence quality with FastQC v0.11.8 (Andrews, 2010) and multiQC  
132 v1.9 (Ewels et al., 2016).

133

134 Next, we filtered raw reads, assembled them *de novo*, and identified variants using the stack  
135 v2.3 pipeline (Catchen et al., 2013). For parameter optimization, we ran STACKS several times  
136 on the entire dataset, varying the values for the *ustack* parameter *M* (the number of mismatches  
137 allowed between stacks to merge them into a putative locus) from 1-5 (*M1-M5*) and the *cstack*  
138 parameter *n* (the number of mismatches allowed during the construction of the catalog) from *M*-

139 1 to M+1. The other parameters were kept constant as they were shown to work well in previous  
140 reviews of stacks' parameter space (Paris et al., 2017; Rochette & Catchen, 2017) and were as  
141 follows: process\_radtags (--clean, --quality, --filter\_illumina, -t 61, --disable\_rad\_check); ustacks  
142 (--disable-gapped, --model\_type bounded, --bound\_high 0.05, -max\_locus\_stacks 4, -m 3, -H);  
143 cstacks (--disable-gapped); and, population (-R 0.70, min-mac 2, --vcf). For each run, we  
144 visualized the effect of M and n values on several metrics, including the number of loci and  
145 polymorphic loci shared by 70% of the samples, the distribution of single nucleotide  
146 polymorphisms (SNPs) per loci, and the proportion of loci with proportion of heterozygotes for a  
147 given locus (H) greater than 0.55 or a read ratio deviation (D) greater than 7 inferred with  
148 HDplot (see below). Based on the effect of M and n values on these metrics (Fig S1), we  
149 identified M2 and n2 as optimal parameters as they maximized polymorphism while minimizing  
150 the number of potentially erroneous SNPs.

151  
152 The resulting data were then filtered with vcftools v1.16 (Danecek et al., 2011) for data  
153 missingness. Specifically, we started with low cut-off values for missing data applied separately  
154 per individual and locus that we then iteratively and alternatively increased to exclude low-  
155 quality locus and individuals (Leary et al., 2018). Final filters included sites genotyped at >70%  
156 of individuals, individuals genotyped at >70% of loci, and polymorphic loci with a minor allele  
157 count greater than two. We imported the resulting data into HDplot (McKinney et al., 2017) to  
158 investigate allelic read depth and heterozygosity; we removed SNPs with an H greater than 0.5 or  
159  $|D|>7$  as they could result from potential error in loci splitting and bioinformatics. Finally, in loci  
160 with multiple SNPs, we selected the SNP with the highest minor allele frequency for  
161 downstream analyses.

162

### 163 **Invasion history analysis**

164 **Bottleneck evaluation** - To test whether the Tench population experienced a genetic bottleneck,  
165 we used the approximate Bayesian Computation random-forest method implemented in  
166 DIYABC Random Forest v1.0 (Collin et al., 2021). We simulated training sets under two groups  
167 of competing scenarios referring to the absence (group 1: scenarios 1, 2, 3, and 4) or the  
168 occurrence (group 2: scenarios 5, 6, 7, and 8) of a recent bottleneck (Figure 2). Demographic  
169 parameters included four population sizes ( $N_{ancestral}$ ,  $N_{bottleneck}$ ,  $N_{establishment}$ , and  
170  $N_{contemporary}$ ), two sampling events  $t_0$  (for the contemporary samples) and  $t_b$  (for the original  
171 samples), and up to three changes in effective population sizes ( $t_a$  for changes between the  
172 contemporary and the original samples,  $t_c$  for changes before the original samples, and  $t_d$  for  
173 changes between the ancestral and the bottleneck population). Prior values were drawn from  
174 uniform distributions with  $t_0 < t_a < t_b < t_c < t_d$  (going backward in time). We parameterized the  
175 bottleneck timing and population size ( $t_d = [1-100]$ ;  $N_{bottleneck} = [2-100]$ ) to reflect the reported  
176 importation of about 30 Tench specimens to Quebec in the 1980s (Dumont et al., 2002).  
177 Sampling events reflected the sampling of the contemporary ( $t_0 = [0-5]$ ) and original ( $t_b = [2-15]$ )  
178 population in 2017-19 and 2002, respectively. We used uniform prior values between 2 and 15 to  
179 reflect population expansion between the contemporary and the original samples ( $t_a$ ) and  
180 between 2 and 50 to reflect population expansion before sampling of the original population ( $t_c$ ).  
181 Finally, we used a broad range of priors to reflect uncertainties around population sizes  
182 ( $N_{ancestral}$ ,  $N_{contemporary}$ ,  $N_{establishment} = [2-10,000]$ ). Under all scenarios, we assumed that the  
183 population was the result of a single introduction (see **Results**).

184

185 To identify the most likely demographic trajectory, we conducted the scenario-choice analysis  
186 twice. First, we tested whether the occurrence of a genetic bottleneck was important by  
187 conducting an analysis at the group level (with vs. without bottleneck). Second, we considered  
188 the eight scenarios separately. The training set included a total of 40,000 simulated datasets (i.e.  
189 5,000 per scenario), and we fixed the number of trees in the constructed random forest to 1,000.  
190 Next, for scenario 5 (the best-suited scenario among the set of 8: see **Results**), we estimated the  
191 parameters involved in the invasion history: ancestral ( $N_{\text{ancestral}}$ ) and bottleneck population size  
192 ( $N_{\text{bottleneck}}$ ); and, the bottleneck time (td). For this analysis, the training set included 10,000  
193 simulated datasets and 1,000 trees in the random forests. We ensured that the number of  
194 simulated datasets was sufficient for scenario selection and parameter estimation by evaluating  
195 the stability of both results and accuracy metrics (results not shown).

196  
197 **Temporal changes in genetic diversity and effective population size** - We computed several  
198 measures of genetic diversity for both original and contemporary populations. At the population-  
199 level, we calculated observed heterozygosity ( $H_o$ ), within-population gene diversity ( $H_s$ ), and  
200 within-population inbreeding coefficient ( $F_{is}$ ) using HierFstat (Meeus & Goudet, 2007). These  
201 metrics are either insensitive to ( $H_o$ ,  $F_{is}$ ) or corrected for ( $H_s$ ) sample sizes. We also computed  
202 two metrics of genetic diversity at the individual-level: multilocus heterozygosity (MLH),  
203 defined as the number of heterozygous SNPs divided by the number of SNPs genotyped, was  
204 calculated using the package inbreedR (Stoffel et al., 2016); and, Individual Relatedness (IR), a  
205 metric related to the relative location of individuals along the outbred-inbred continuum, using  
206 the package Rhh (Alho & Valimaki, 2012). Negative IR values indicate outbreeding, positive  
207 values inbreeding. We tested for temporal changes between the original and contemporary

208 populations in samples'  $H_o$  and  $H_s$  using Wilcoxon sign-ranked test with locus treated as paired  
209 measures between populations. Because the number of samples were highly uneven between the  
210 original and contemporary populations (biased towards the contemporary population), we used  
211 randomization tests with 5,000 samples to produce accurate estimates of the p values for  
212 temporal differences in average MLH and IR.

213

214 To provide further insights into temporal changes in eco-evolutionary dynamics, we also  
215 estimated the effective population size using the linkage disequilibrium ( $N_{eLD}$ ) method  
216 implemented in NeEstimator V2.1 (Do et al., 2014). This method assumes that, in small  
217 populations, heightened drift causes non-random associations between unlinked alleles. For our  
218 sample size, the least biased estimates (i.e. excluding singleton alleles) is for allele exclusion  
219 criteria  $P_{crit} = 0.1$ ; however, we evaluated how rare alleles affected  $N_e$  by looking at  $N_e$   
220 variation across the range of  $P_{crit}$  value (0, 0.1, 0.2, and 0.5). Stable  $N_e$  across  $P_{crit}$  values are  
221 suggestive of stable, isolated populations; whereas, high variance across  $P_{crit}$  values could  
222 highlight demographic processes resulting in excess of rare alleles, such as contemporary gene-  
223 flow (Waples & England, 2011) or demographic expansion (Excoffier et al., 2009). We do not  
224 discuss the results from the linkage disequilibrium method in the original population as it  
225 produced infinite estimates, a likely consequence of the small sample size.

226

227 **Spatiotemporal patterns in genetic structuring** - To identify potential clusters of genetically  
228 differentiated populations across time and space, we used two nonspatial analytical approaches: a  
229 Principal Component Analysis (PCA) to explore patterns in the genetic data; and, a Discriminant  
230 Analysis of Principal Component (DAPC) using the R package Adegenet (Jombart & Ahmed,

231 2011) to identify clusters of genetically similar individuals. In these analyses, original and  
232 contemporary samples were included together. We evaluated the degree of population  
233 differentiation based on  $F_{st}$  and associated bootstrap confidence intervals. PCA creates synthetic  
234 variables to maximize variation among samples. In contrast, DAPC identifies groups of  
235 genetically similar individuals by transforming the raw data using PCA and then performing a  
236 discriminant analysis on the retained PCs to maximize between-group variability while  
237 neglecting within-group variation (Jombart et al., 2010). We used DAPC without the a-priori  
238 assumption of population structure. To assign samples to groups subsequently used as population  
239 identifier, we performed K-mean clustering from K1 to K10 with all PCs retained. To identify  
240 the best K, we used the “diffNgroup” criterion, which identifies the best K based on Bayesian  
241 Information Criterion (BIC) differences between successive values of K, as well as the “min”  
242 criterion, which retains the model with the smallest BIC. We determined how many PCs to retain  
243 based on cross validation: DAPC were performed on a training dataset comprising 90% of the  
244 samples in each subpopulation with different numbers of PCs retained and then used this to  
245 predict the group of the remaining 10%. We retained the number of PCs associated with the  
246 lower mean squared error to perform the DAPCs.

247

## 248 **Fine-scale population genomics and dispersal**

249

250 **Within-population subdivision** - To assess contemporary population subdivision within the  
251 invaded range and identify potential areas of spatial discontinuities, we used multivariate  
252 methods that integrate spatial information into the analyses of genetic dissimilarity (i.e. Spatial  
253 Principal Component Analysis (sPCA), MEMgene). For these analyses, the original samples

254 from 2002 were excluded. sPCA aims to identify spatial genetic patterns by analyzing spatial  
255 autocorrelation. To do so, it computes a matrix of Moran's index inferred from the comparison  
256 between individual allelic frequencies to that of a user-defined connection network (Jombart et  
257 al., 2008). Variation is then analyzed with respect to variables (eigenfunctions) representing  
258 geographic variation that are attributed to positive (when individuals in the same neighbourhood  
259 have similar allelic frequencies, referred to as global structure) or negative (when individuals in  
260 the same neighbourhood have dissimilar allelic frequencies, referred to as local structure)  
261 autocorrelations. We set the connection network to a minimum distance neighbour graph. To  
262 characterize distance between samples, we first computed the shortest river network distance  
263 between samples that we then re-projected as Cartesian coordinates using non-metric  
264 multidimensional scaling (nMDS) in the vegan package (Oksanen et al., 2019). We then tested  
265 for significant global and local structure using the Monte Carlo simulation with 999  
266 permutations. For visualization, we retained the two largest positive values and the three largest  
267 negative values. We performed the sPCA in Adegenet (Jombart & Ahmed, 2011).

268  
269 MEMgene uses Moran's eigenvector maps to analyse a weighted connection network. The  
270 identified spatial patterns, known as MEM eigenvectors, describe the patterns of positive and  
271 negative autocorrelation in the data (Galpern et al., 2014). The analysis then implements a  
272 forward selection procedure to identify the MEM eigenvectors that are statistically significant in  
273 a genetic distance matrix. For this reason, it performs better than sPCA in fragmented landscapes  
274 and highly mobile organisms (Galpern et al., 2014). In this analysis, we used least-cost river  
275 network distance between samples as weights in the network and the proportion of shared alleles  
276 as genetic distance. We implemented the forward selection of the statistically significant MEM

277 eigenvectors to identify spatial patterns and used  $R^2_{adj}$  to estimate the strength of these spatial  
278 patterns.

279

### 280 **Genetic neighbourhood size and spatial variation in genetic diversity**

281 To understand how genetic diversity is spatially distributed across the invaded range, we used  
282 sGD ( Shirk et al., 2011) to compute metrics of genetic diversity based on the genetic  
283 neighbourhood surrounding each individual. To identify the size of a genetic neighbourhood,  
284 defined as the distance at which pairwise genetic distances are no longer significantly correlated  
285 (Wright, 1946), we produce Mantel correlograms across a range of distance classes using the  
286 ecodist package (Goslee & Urban, 2007). We identified the genetic neighbourhood as the first  
287 distance class at which spatial correlation was no longer statistically significant (Shirk et al.,  
288 2011). For this analysis, we explored distance classes from 10 km to 300 km at intervals of 10  
289 km and ran each test with 999 permutations. Next, for a set radius of 220 km (the genetic  
290 neighbourhood size based on Mantel correlograms: see **Results**), we computed observed  
291 heterozygosity ( $H_o$ ), expected heterozygosity ( $H_e$ ), and allelic richness ( $A_r$ ) for each genetic  
292 neighbourhood with a minimum sample size of 20 individuals. We did not compute these metrics  
293 for the Lake Ontario sample because no other samples were within its genetic neighbourhood  
294 distance. Finally, as a comparison to the neighbourhood grouped metrics of genetic diversity, we  
295 also examined spatial variation in the individual-level metrics of genetic diversity (IR, MLH).

296

297 Next, we used linear regressions to examine the influence of range expansion on genetic  
298 diversity metrics. We included river distance (least-cost distance following the watercourse)  
299 from the putative origin, individual location relative to the putative origin (north or south), and



300 their interaction, as explanatory variables in the models. To select the best models, we conducted  
301 backwards model selection by testing the significance of the fixed effects with likelihood-ratio  
302 tests. We started with the interaction term and removed non-significant fixed effects from the  
303 models. We removed the Lake Ontario individual whose distance from the putative origin of the  
304 invasion was 4.5-fold greater than the mean distance) and, consequently, had a disproportionate  
305 influence on the linear regressions; however, interpretation of the results were consistent across  
306 analyses including or excluding this individual. We used *gdistance* (Van Etten, 2017) to compute  
307 the river distance between each of the samples and the putative site of introduction in the  
308 Richelieu River.

309

## 310 **Results**

### 311 **Genomic data**

312 We identified 8,300 loci in the full Tench dataset; of those, 28% were polymorphic. After  
313 filtering, 1898 SNPs for 203 individuals remained in the final dataset (195 contemporary samples  
314 and 8 original samples). Many of the individuals discarded from the analysis were from dried fin  
315 clips, and the loss of those individuals is likely due to degraded DNA. The average read number  
316 per individual was 2,401,426 (SD=998,292); individual missingness was on average 11.9%  
317 (SD=7.8%) across the entire dataset, and average loci missingness was 11.9% (SD=5.9%).

318

### 319 **Demographic history**

320 The DIYABC Random Forest analysis showed clear evidence of a recent bottleneck in the SLR-  
321 Richelieu-Champlain Tench population. Classification votes and estimated posterior  
322 probabilities were supportive of scenario group 2 (1,000 votes out of the 1,000 RF-trees,  
323 posterior probability=0.996), which included the contemporary bottleneck (Table 1). When

324 considering the eight scenarios independently, the highest classification votes and estimated  
325 posterior probabilities were for scenario 5 (820 votes out of the 1,000 RF-trees, posterior  
326 probability=0.832), which assumed a contemporary population bottleneck and no subsequent  
327 recovery. We observed that our capacity to discriminate between scenarios was better at the  
328 group- than the scenario-level, as shown by the lower overlap between the simulated datasets on  
329 the LD axes (Figure S5) and the lower global prior rate (0.029 and 0.483, respectively).

330

331 Focusing on scenario 5, parameter values had broad confidence intervals spanning most of the  
332 prior range. Estimated parameters (median [95% CI]) were as follow; 5244 [2138-9375] for the  
333 ancestral population size, 75 [37-99] for the bottleneck population size, and 52 generations [25-  
334 93] for the timing of the bottleneck event. Estimations were substantially more accurate for the  
335 bottlenecked population size and the timing of the bottleneck than the ancestral population size,  
336 as determined by lower normalized mean absolute error (NMAE) values (results not shown).

337

### 338 **Temporal changes in genetic diversity and effective population size**

339 At the population-level, we detected no statistically significant difference ( $p=0.461$ ) in observed  
340 heterozygosity between the original population ( $H_o$  mean (SD)=0.308 ( $\pm 0.276$ )) and the  
341 contemporary population ( $H_o=0.298$  ( $\pm 0.196$ )) (Figure 3). In contrast, within-population gene  
342 diversity was significantly higher ( $p<0.001$ ) in the contemporary population ( $H_s= 0.295$   
343 ( $\pm 0.159$ )) relative to the original population ( $H_s= 0.272$  ( $\pm 0.200$ )); the change represents an  
344 average gain of 2.3% of the polymorphism between the original population and the  
345 contemporary population. We observed that  $H_o$  was higher than  $H_s$  by 3.6 and 0.3% in the  
346 original and the contemporary populations. Accordingly,  $F_{is}$  was negative and significantly

347 different from zero in the original population (95% CI= [-0.172 to 0.119]) but not in the  
348 contemporary samples ([-0.020 to 0.006]). Finally, in the contemporary population, we obtained  
349 a point estimate for  $N_{eLD}$  of 113.8 (95% CI = [106-122.5]). We observed that  $N_{eLD}$  varied by  
350 nearly 25% across  $P_{crit}$  values (FigS2).

351  
352 At the individual level, genetic diversity was lower in the original population (Figure 3, Fig S3).  
353 Original population specimens had significantly ( $p=0.04$ ) higher internal relatedness (mean IR  
354 (SD)=0.468 (0.109)) than the contemporary population (IR= 0.379 (0.116)) and significantly  
355 lower values ( $p=0.015$ ) of multilocus heterozygosity (mean  $MLH_{original}$  (SD)= 0.479 (0.029),  
356  $MLH_{contemporary}$  (SD)=0.504 (0.0279)). These changes represent a loss of 8.9% of the inbreeding  
357 and a gain of 2.5% of polymorphism present at the individual level between the 2002 samples  
358 and the contemporary population. The internal relatedness values were all positive, indicating  
359 that both populations show signs of inbreeding.

360

### 361 **Spatiotemporal patterns in genetic structuring**

362 The PCA, DAPC, and tests of genetic differentiations indicated that the Tench population of  
363 eastern Canada, including both original and contemporary individuals, is best described as a  
364 single genetic population. In the PCA, PC1 and PC2 cumulatively accounted for less than 5% of  
365 the total variance in genetic diversity (Figure 4). While there was no clear pattern emerging from  
366 the distribution of individuals along PC2, PC1 separated Lake Champlain Tench from the rest of  
367 the samples. However, this pattern was not resolved with the de-novo DAPC analysis. Results of  
368 the K-mean clustering analysis showed that K increased linearly from 1-10 (Figure 4); while the  
369 lowest BIC score was for  $K=1$ , the greatest difference between successive BIC value was

370 reached for  $K=4$ . However, there were no associations between the *de-novo* identified clusters  
371 and sampling locations across time and space. Concomitantly, while  $F_{st}$  was significantly  
372 different from zero, its value was below 1.5% ( $F_{st}$  [95% bootstrapped CI] = 0.0067[0.0049-  
373 0.0136]).

374

### 375 **Fine-scale population genomics and dispersal**

376 Together, the sPCA and MEMgene analysis revealed patterns of weak within-population sub-  
377 structuring across the contemporary range of invasive Tench. In the sPCA, the global test  
378 suggested the presence of statistically significant global structure across the invaded range  
379 ( $\max(t)=0.001$ ,  $p=0.001$ ). For visualization, we retained the two largest positive values. sPCA  
380 axis 1 showed a clinal pattern of genetic differentiation across the invaded range (Figure 5).  
381 genotypes located at the front of invasion showed the most extreme scores, but there was no  
382 sharp boundaries between individuals; rather, the change was progressive, with individuals  
383 located in the middle having less extreme scores. The second axis (Figure 5) captured the same  
384 cline in allelic diversity, with a subtle difference: individuals were more similar than expected by  
385 chance in the southern section of Lake Champlain. There was no significant local structure  
386 across the invaded range ( $p=0.071$ ). In the MEMgene analyses, a spatial pattern of genetic  
387 structuring emerged that was not evident in the sPCA analysis (Figure 5). Specifically, the spatial  
388 genetic pattern was more clustered, with circles of similar size and colour found in proximity,  
389 suggesting a more fragmented landscape. Overall, however, the strength of these spatial genetic  
390 patterns was weak ( $R^2=0.022$ ).

391

### 392 **Genetic neighbourhood size and spatial variation in genetic diversity**

393 The Mantel correlograms revealed the presence of significant positive spatial structure up to the  
394 distance class of 220 km (Figure 6). Estimates of genetic diversity at the genetic neighbourhood  
395 scale did not vary widely across the invaded range; mean (min, max) estimates were 1.907  
396 (1.904, 1.910) for Ar, 0.298 (0.295, 0.302) for Ho, and -0.011 (-0.016, -0.005) for FIS.

397  
398 Linear models highlighted contrasting trends in genetic diversity metrics as a function of  
399 invasion directionality (whether individuals were on the southern or the northern side of the  
400 introduction site) (Figure 7). In the MLH model, the only significant fixed effect was distance  
401 (adj.  $R^2(191)= 0.02$ ,  $p=0.046$ ); specifically, as distance from the origin increased, MLH  
402 decreased (-0.007 MLH/100km). In all other models, the interaction between least-cost river  
403 distance and individual location relative to the introduction site was significant. These models  
404 included the IR model (adj.  $R^2(189)= 0.095$ ,  $p<0.001$ ) and, at the genetic neighbourhood-level,  
405 the Ar (adj.  $R^2(189)= 0.85$ ,  $p<0.001$ ), the Ho (adj.  $R^2(189)= 0.98$ ,  $p<0.001$ ), and the FIS model  
406 (adj.  $R^2(189)= 0.92$ ,  $p<0.001$ ). Ar richness decreased by 0.003 and  $<0.001$  with distance from the  
407 origin on the northern (towards the SLR) and southern (towards Lake Champlain) invasion axes,  
408 respectively. For the other metrics (ID, Ho, and FIS), trends were in opposite directions on the  
409 two invasion axes.

410  
411 In general, changes in genetic diversity metrics were of small magnitude (Figure 7). Specifically,  
412 individuals were more inbred (+0.08 IR unit/100 km) as distance from the origin increased on the  
413 northern invasion axis (towards the SLR), and less inbred (-0.06 IR unit/100 km) on the southern  
414 invasion axis (towards Lake Champlain). Genetic neighbourhoods became slightly less  
415 heterozygous (-0.002 Ho/100 km) and FIS decreased (-0.004 FIS/100 km) on the northern

416 invasion axis. On the southern axis, heterozygosity (+0.003  $H_o$ ) and FIS increased (+0.001  
417 FIS/100 km) with distance.

418

## 419 **Discussion**

420 We analyzed genomic data from the invasive population of Tench in eastern North America to  
421 discriminate between hypotheses related to the species' demographic history and connectivity  
422 throughout the invaded range. Using a dataset with 1898 SNPs for 203 individuals, we found low  
423 genetic diversity, a lack of marked population subdivision across time and space, and evidence of  
424 a recent genetic bottleneck. Consistent with the presumed invasion history of the species in  
425 Quebec (Dumont et al., 2002; Avlijas et al., 2018), our results support the “single introduction”  
426 hypothesis and add evidence that introduced populations can thrive despite recent bottlenecks  
427 and low levels of genetic diversity (Dlugosch & Parker, 2008; Dlugosch et al., 2015).

428 Furthermore, the weak within-population genetic substructure and extremely large genetic  
429 neighbourhood sizes exhibited by the population support the “high connectivity” hypothesis,  
430 thereby contradicting the assumption that Tench has a low capacity for natural dispersal (Moyle,  
431 1976). Consequently, contrary to what we would expect for a species expanding its geographic  
432 range across hundreds of kilometres, Tench genetic diversity losses due to repeated founder  
433 events were not significant.

434

## 435 **Demographic changes and bottlenecks**

436 We found strong evidence of a recent demographic bottleneck in the Tench population. Across  
437 eight scenarios representing several demographic trajectories with and without recent population  
438 bottlenecks, DIYABC unequivocally identified the group of scenarios incorporating a recent

439 bottleneck as most likely. The most likely scenario included a bottleneck and no subsequent  
440 recovery, suggesting that the effective population size has not increased substantially following  
441 the recent demographic expansion. This finding was corroborated by our estimate of the effective  
442 population size in the low hundreds for the contemporary population, which likely reflects  
443 limited genetic diversity in the founder population. Furthermore, although we detected  
444 significant temporal (~6 generations) changes in some metrics of genetic diversity at the  
445 individual (e.g., MLH, IR) and the population levels ( $H_o$ ), the differences were generally  
446 modest. This slow recovery in genetic diversity could be explained by the absence of  
447 immigration of new genotypes during the population recovery phase (Jangjoo et al., 2016), a  
448 hypothesis partially confirmed by the lack of strong genetic structure across time and space.  
449

450 Consistent with previous studies, our results suggest that parameters inferred from DIYABC  
451 might bear some errors and downward biases, at least in point estimates (Cabrera & Palsbøll,  
452 2017; Cammen et al., 2018). Indeed, most estimates had broad confidence intervals spanning  
453 most of the prior range. In particular, the pre-bottleneck population size was highly imprecise,  
454 with the upper bound of the range being more than 4-fold greater than its lower bound. For  
455 estimated bottlenecked population size, the lower bound of the confidence interval (37  
456 individuals) was remarkably close to our expectations, since Dumont et al. (2002) reported that  
457 about 30 live Tench were illegally imported to QC from Germany in the mid-1980s. On the other  
458 hand, the bottleneck was estimated to have occurred as little as 25 generations ago; however,  
459 based on an age at first maturity of three years old (Ablak Gürbüz, 2011), the Tench introduction  
460 to QC occurred only ~15 generations ago. Therefore, we cannot rule out the possibility that the  
461 bottleneck occurred before the introduction of Tench (possibly at the European source) to eastern

462 North America. Further model evaluations are warranted to ensure that the approach can be  
463 applied reliably to obtain very specific insights (e.g. population size, timing of events), as  
464 opposed to general insights (e.g. occurrence of a bottleneck), from natural populations.  
465  
466 Collectively, our data highlight that small, introduced populations can do well in new  
467 environments, despite bearing the genetic consequences of a bottleneck. Only thirty years after  
468 its introduction, Tench has colonized more than 500 km of riverine habitat and its population  
469 abundance has grown exponentially (Avlijas et al., 2018). Introduced populations able to flourish  
470 in novel ecosystems are often cited as examples of the genetic paradox of invasions, which  
471 suggests that they are able to adapt successfully even after experiencing genetic bottlenecks  
472 (Allendorf & Lundquist, 2003). However, additional explanations to the success of Tench in the  
473 region, despite the genetic consequences of a recent bottleneck, should be considered (Estoup et  
474 al., 2016). First, analyses based on Tench habitat requirements and life-history characteristics  
475 previously identified the invaded region as suitable for Tench (Devaney et al., 2009; Kolar &  
476 Lodge, 2002). Therefore, long-term adaptation to habitats ecologically similar to those in the  
477 native range might have facilitated the species' successful establishment and subsequent  
478 geographic spread in the invaded region (Bossdorf et al., 2008). Second, the source of  
479 introduction of Tench to eastern North America was likely from a fish farm or a site within very  
480 close proximity of human transportation systems. Adaptation to human-altered habitats in the  
481 native range, potentially favoured by repeated introductions throughout the history of Tench  
482 (Clavero, 2019; Lajbner et al., 2011), could also be advantageous throughout the invaded region  
483 (Hufbauer et al., 2011). Indeed, the invaded area harbours two of Canada's largest cities  
484 (Montreal, Toronto) and is characterized by highly active farming and shipping industries. Third,



485 Tench has a relatively generalist life history and, although the SLR might not perfectly match its  
486 habitat needs, the species might have reduced needs for adaptation to become invasive (Hufbauer  
487 et al., 2011). Consequently, further research on adaptive changes is required to discover whether  
488 the population truly is paradoxical (Estoup et al., 2016). Regardless, the introduced Tench  
489 population flourishes despite harbouring low genetic diversity and having gone through a recent  
490 bottleneck.

491

### 492 **Range expansion and connectivity**

493 The large genetic neighbourhood size suggests that Tench is capable of extensive dispersal  
494 across the invaded range. Tench sampled within a radius of 220 km were found to belong to the  
495 same breeding population, the first indirect genetic estimate of dispersal for the species. The  
496 geographic distance at which we detected genetic autocorrelation was consistent with the average  
497 lifetime dispersal distance of 80 km and the maximum movement distance of 250 km inferred  
498 from otolith chemistry data (Morissette et al., 2021). These convergent results of two  
499 independent studies relying on different approaches highlight the high capacity for dispersal of  
500 the species in the system.

501

502 Tench exhibited weak population substructure, most likely rooted in high dispersal ability and  
503 lack of strong landscape barriers to gene flow. Collectively, the patterns emerging from the fine-  
504 scale population substructure (sPCA and MEMgene) of Tench in eastern North America suggest  
505 a complex clinal pattern of isolation-by-distance due to limited dispersal capacity relative to the  
506 size of the landscape, with weak genetic discontinuities throughout the invaded range. The  
507 genetic discontinuities did not coincide with major known geographic barriers (e.g. dams,

508 rapids); instead, patches tended to be linked to larger waterbodies (e.g. lakes), where individuals  
509 might aggregate and/or be sampled in higher densities.

510

511 While some species do exhibit reduced genetic diversity near the front of the range expansion  
512 compared to the core (Garroway et al., 2011; Watts et al., 2010), we found equivocal support for  
513 this theoretical prediction (Swaegers et al., 2013). Although there was a marginal loss of genetic  
514 diversity for some metrics, genetic diversity was mostly preserved during the geographic  
515 expansion of the studied population. Simulation studies predict that, during range expansions,  
516 genetic diversity losses due to serial founder events and bottlenecks can be mitigated by high  
517 dispersal from the core and/or the genetic contributions from a large number of breeders (Miller  
518 et al., 2020; Williams et al., 2019). This is likely the case in our study as the large genetic  
519 neighbourhood size and lack of strong spatial structuring are consistent with high connectivity.  
520 In particular, the large neighbourhood size indicates that dispersal throughout the entire range  
521 can occur within three generations (potentially less with occasional long-distance dispersal  
522 events). In contrast, species with limited dispersal are more likely to behave like a set of  
523 separate sub-populations, which are more likely to lose genetic diversity through genetic drift  
524 due to reduced effective population sizes (Wright, 1946). Consequently, the size of the genetic  
525 neighbourhood relative to the area of range movement, which primarily reflects species'  
526 dispersal patterns, could be a useful predictor of the fate of genetic variation in populations  
527 undergoing range expansions.

528

529 Our results also highlight that range expansions can have different outcomes on spatial patterns  
530 of genetic diversity in populations expanding in multiple directions. We found a small, but

531 significant, loss of genetic diversity for several metrics along the northern invasion axis (towards  
532 the SLR), while genetic diversity was preserved or increased along the southern Lake Champlain  
533 invasion axis. This result is compatible with several non-exclusive hypotheses. First, faster range  
534 expansions might retain more genetic diversity than those occurring at slower rates (Goodsman  
535 et al., 2014). Range expansion occurred faster along the southern invasion axis compared to the  
536 slower and more recent northern expansion. Second, the strength of genetic drift after  
537 colonization might influence spatial patterns of genetic diversity (Andrade-Restrepo et al., 2019;  
538 Swaegers et al., 2013). It might be that individuals in southern Lake Champlain experienced less  
539 genetic drift after colonization than those in the SLR due to earlier colonization of, and higher  
540 connectivity within, Lake Champlain, which might help retain similar levels of genetic diversity  
541 between the core populations and the southern margin. In Lake Champlain, connectivity is likely  
542 facilitated by the relatively homogeneous, nonlinear environment facilitating multi-directional  
543 dispersal. Third, differences in habitat quality might lead to local variations in population  
544 densities, thereby affecting the strength of drift and the number of mutations (Excoffier et al.,  
545 2009; Shirk et al., 2014). For example, water quality in Lake Champlain is generally higher than  
546 that of the Richelieu River due to the lower agricultural and industrial footprint and thus might  
547 be able to sustain larger populations. Collectively, this result highlights that heterogeneous  
548 landscape and population demography can generate variability in the genetic consequences of  
549 range expansions (Excoffier et al., 2009; Miller et al., 2020).

550

### 551 **Implications for Tench management**

552 Our analysis of the spatiotemporal patterns of genetic diversity and structure of Tench has the  
553 potential to improve management of the invasive population in eastern North America. First, our

554 inference of large genetic neighbourhoods (225 km) and high connectivity throughout the  
555 invaded region casts doubts on the potential for complete eradication of the species in the region.  
556 To keep areas of conservation priority free of Tench, the large neighbourhood size indicates that  
557 eradicating the species within a ~112 km radius will be necessary to prevent recolonization.  
558 Even if this could be achieved, there is still a possibility that the area might eventually be  
559 recolonized as lifetime dispersal distances up to 250 km have been documented (Morissette et  
560 al., 2021). Consequently, instead of eradication, management plans should aim at managing the  
561 species to minimize its impacts across the invaded range.

562  
563 Second, our results confirm that Tench capacity for dispersal is higher than previously expected  
564 (Avlijas et al., 2018; Cudmore & Mandrak, 2011; Kolar & Lodge, 2002), which suggests that  
565 current risk assessments underestimate its potential invasiveness. This implies that colonization  
566 of the Laurentian Great Lakes is imminent (Avlijas et al., 2018; Morissette et al., 2021), as  
567 perhaps foreshadowed by the capture of a live specimen in Lake Ontario in 2018, more than a  
568 genetic neighbourhood size ahead of the known invasion front. Because this individual did not  
569 differ genetically from the rest of the invaded range, its presence in Lake Ontario might be the  
570 result of a long-distance dispersal event (natural or human-aided). Alternatively, it could indicate  
571 the presence of a sleeper population (i.e. an established population persisting in low-abundance:  
572 Spear et al., 2021) ahead of the known invasion front. Our results warrant the implementation of  
573 targeted, cohesive monitoring efforts including both conventional and eDNA sampling  
574 approaches at the invasion front near the Laurentian Great Lakes. eDNA sampling was  
575 highlighted as an efficient tool to detect Tench DNA in the area (García-Machado et al., 2021)  
576 and might be especially useful to detect the presence of a potential sleeper population, which

577 could be below the detection threshold of conventional sampling gear (Spear et al., 2021).  
578 Targeted monitoring could enable the detection of, and rapid response to, the species when it is  
579 still at low abundance in the Great Lakes, where the species is predicted to flourish (Devaney et  
580 al., 2009).

581

## 582 **Study caveats**

583 A number of issues might influence the results of our study. First, the Tench population is  
584 relatively new to the studied area in eastern North America, and it is possible that the effects of  
585 isolation-by-distance and the landscape context on population substructure require time to be  
586 realized (Anderson et al., 2010; Reding et al., 2013). However, it is worth noting that landscape  
587 structures influenced spatial genetic patterns very early (1-14 generations) in a simulation study,  
588 especially in highly vagile species (Landguth et al., 2010). Second, the Tench introduction event  
589 presumably involved a small number of founders and low genetic diversity. These characteristics  
590 could reduce our ability to detect the effects of range expansion and connectivity on spatial  
591 patterns of genetic structure (Landguth et al., 2012). Third, spatial patterns of genetic diversity  
592 and structure are simultaneously shaped by ongoing range expansion and gene flow, which are  
593 themselves influenced by landscape heterogeneity and dispersal. These processes operate on  
594 different spatial and temporal scales, and their respective influence on spatial patterns of genetic  
595 diversity are difficult to disentangle (Cushman, 2015). To confirm the results reported here,  
596 future research should employ simulation modeling implementing spatially explicit individual-  
597 based simulation frameworks, such as CDMetaPOP (Landguth et al., 2017).

598

## 599 **Conclusions**

600 Understanding the consequences of founder effects and population bottlenecks for population  
601 persistence in novel environments is of great practical interest, as these eco-evolutionary  
602 challenges are commonly experienced by both invasive and endangered species (Colautti et al.,  
603 2017). We used a recently introduced invasive population as a model to examine the  
604 consequences of founder events and bottlenecks on spatiotemporal patterns of genetic diversity  
605 and structure. This study provides an example of a small, isolated vertebrate population that  
606 proliferated in a new environment despite reduced genetic diversity and a recent bottleneck (cf.  
607 Dlugosch & Parker, 2008; Uller & Leimu, 2011). Furthermore, the population did not exhibit a  
608 consistent decay in genetic diversity from the invasion core to the margins, despite the large size  
609 and habitat diversity of the invaded range. How this will impact adaptation (Excoffier et al.,  
610 2009) and dispersal (Cobben et al., 2015) as the population continues to expand into new habitats  
611 remains to be discovered. Notably, theoretical predictions suggest that, if dispersal is high  
612 enough, populations relatively well adapted to the introduced range can rapidly spread into the  
613 entire habitable range (Andrade-Restrepo et al., 2019). Range expansion itself could provide an  
614 opportunity for phenotypic changes to occur via spatial sorting, the evolution of dispersal-  
615 enhancing traits due to the concentration of fast-dispersers at the expanding front (Shine et al.,  
616 2011). However, our study also shows that, in natural settings, populations spreading in multiple  
617 directions within a single range expansion might exhibit different evolutionary trajectories. A  
618 better understanding of factors generating variability in the genetic outcomes of range  
619 expansions could allow us to make more accurate predictions related to range expansions,  
620 whether in response to introduction to a new range or to track suitable habitat conditions.

621

622

623 **Acknowledgements**

624 Authors are grateful to Kunali Gohil, Francois Roy, and Emilie Simard for their help in the field;  
625 Nathalie Vachon for providing the original Richelieu samples; and, Nathan Lujan and João Pedro  
626 Fontenelle for their help with bioinformatics. This work was supported by a Vanier Canada  
627 Graduate Scholarship to T.A.B., a Natural Sciences and Engineering Research Council of  
628 Canada (NSERC) Discovery Grant (#05479) to K.M.J., an NSERC Discovery (#05226) and  
629 NSERC Strategic Project (#506528) grants to N.E.M., and a Genome Canada Large-Scale  
630 Applied Research Project grant to K.M.J. and N.E.M.

631

## 632 **References**

- 633 Ablak Gürbüz, O. (2011). Age and reproduction features of Tench (*Tinca tinca* (L., 1758)) from  
634 Hirfanli Dam Lake, Kirsehir, Turkey. *Journal of Fisheries Science*, 5, 153–163.
- 635 Alho, J., & Valimaki, K. (2012). *Rhh: calculating multilocus heterozygosity and heterozygosity-*  
636 *heterozygosity correlation*.
- 637 Allendorf, F. W., & Lundquist, L. . (2003). Introduction: population biology, evolution, and  
638 control of invasive species. *Conservation Biology*, 17, 24–30.
- 639 Anderson, C. D., Epperson, B. K., Fortin, M.-J., Holderegger, R., James, P. M., Rosenberg, M.  
640 S., ... Spear, S. (2010). Considering spatial and temporal scale in landscape-genetic studies  
641 of gene flow. *Molecular Ecology*, 19, 3565–3575.
- 642 Andrade-Restrepo, M., Champagnat, N., & Ferrière, R. (2019). Local adaptation, dispersal  
643 evolution, and the spatial eco-evolutionary dynamics of invasion. *Ecology Letters*, 22, 767–  
644 777.
- 645 Andrews, S. (2010). FastQC: a quality control tool for high throughput sequence data.
- 646 Avlijas, S., Ricciardi, A., & Mandrak, N. (2018). Eurasian tench (*Tinca tinca*): the next Great  
647 Lakes invader. *Canadian Journal of Fisheries and Aquatic Sciences*, 75, 169–179.
- 648 Bayona-vásquez, N. J., Glenn, T. C., Kieran, T. J., Finger, J. W., Louha, S., Troendle, N., ...  
649 Faircloth, B. C. (2019). Adapterama III: Quadruple-indexed, double/triple-enzyme RADseq  
650 libraries. *PeerJ*, 7, 1–25.
- 651 Birzu, G., Matin, S., Hallatschek, O., & Korolev, K. S. (2019). Genetic drift in range expansions  
652 is very sensitive to density dependence in dispersal and growth. *Ecology Letters*, 22, 1817–  
653 1827.
- 654 Bossdorf, O., Lipowsky, A., & Prati, D. (2008). Selection of preadapted populations allowed  
655 *Senecio inaequidens* to invade Central Europe. *Diversity and Distributions*, 14, 676–685.
- 656 Cabrera, A. A., & Palsbøll, P. J. (2017). Inferring past demographic changes from contemporary  
657 genetic data: A simulation-based evaluation of the ABC methods implemented in DIYABC.  
658 *Molecular Ecology Resource*, 17, 94–110.
- 659 Cammen, K. M., Schultz, T. F., Bowen, W. D., Wendy, H., Jonathan, B. P., Frederick, R., ...  
660 Michael, A. W. (2018). Genomic signatures of population bottleneck and recovery in  
661 Northwest Atlantic pinnipeds. *Ecology Ad Evolution*, 8, 6599–6614.
- 662 Catchen, J., Hohenlohe, P. A., Bassham, S., & Amores, A. (2013). Stacks $\square$ : an analysis tool set  
663 for population genomics. *Molecular Ecology*, 22, 3124–3140.
- 664 Chakraborty, R., & Nei, M. (1977). Bottleneck effects on average heterozygosity and genetic  
665 distance with the stepwise mutation model. *Society for the Study of Evolution*, 31, 347–356.
- 666 Chen, S., Zhou, Y., Chen, Y., & Gu, J. (2018). fastp: an ultra-fast all-in-one FASTQ  
667 preprocessor. *Bioinformatics*, 34, 884–890.
- 668 Clavero, M. (2019). Beyond one bone: interdisciplinarity to assess nativeness of the tench (  
669 *Tinca tinca*) in Spain. *Aquatic Conservation: Marine and Freshwater Ecosystems*, 29,  
670 1863–1869.
- 671 Cobben, M. M. P., Verboom, J., Opdam, P. F. M., Hoekstra, R. F., Jocjem, R., & Smulders, M.  
672 (2015). Spatial sorting and range shifts: consequences for evolutionary potential and genetic  
673 signature of a dispersal trait. *Journal of Theoretical Biology*, 373, 92–99.
- 674 Colautti, R. I., Alexander, J. M., Dlugosch, K. M., Keller, S. R., & Sultan, S. E. (2017).  
675 Invasions and extinctions through the looking glass of evolutionary ecology. *Philosophical*  
676 *Transactions of the Royal Society B: Biological Sciences*, 372, 1–12.
- 677 Collin, F.-D., Durif, G., Raynal, L., Lombaert, E., Gautier, M., Vitalis, R., ... Estoup, A. (2021).



- 678 Extending approximate Bayesian computation with supervised machine learning to infer  
679 demographic history from genetic polymorphisms using DIYABC Random Forest.  
680 *Molecular Ecology Resources*, 1–16.
- 681 Cudmore, B., & Mandrak, N. (2011). *Biological synopsis of tench (Tinca tinca)*.
- 682 Cushman, S. A. (2015). Pushing the envelope in genetic analysis of species invasion. *Molecular*  
683 *Ecology*, 24, 259–262.
- 684 Danecek, P., Auton, A., Abecasis, G., Albers, C. A., Banks, E., Depristo, M. A., ... Vcf, T.  
685 (2011). The variant call format and VCFtools. *Bioinformatics Applications Note*, 27, 2156–  
686 2158.
- 687 Devaney, S. C., Mcnyset, K. M., Williams, J. B., Peterson, A. T., & Wiley, E. O. (2009). A tale  
688 of four “Carp”: invasion potential and ecological niche modeling. *PLoS One*, 4, 1–10.
- 689 Dlugosch, K.M., & Parker, I. M. (2008). Founding events in species invasions: genetic variation,  
690 adaptive evolution, and the role of multiple introductions. *Molecular Ecology*, 17, 431–449.
- 691 Dlugosch, Katria M, Anderson, S. R., Braasch, J., Cang, F. A., & Gillette, H. D. (2015). The  
692 devil is in the details: genetic variation in introduced populations and its contributions to  
693 invasion. *Molecular Ecology*, 24, 2085–2111.
- 694 Dlugosch, Katrina M, & Parker, M. (2008). Invading populations of an ornamental shrub show  
695 rapid life history evolution despite genetic bottlenecks. *Ecology Letters*, 11, 701–709.
- 696 Do, C., Waples, R., Peel, D., Macbeth, G., Tillett, B., & R, O. (2014). NeESTIMATOR v2: re -  
697 implementation of software for the estimation of contemporary effective population size  
698 (*Ne*) from genetic data. *Molecular Ecology Resources*, 14, 209–214.
- 699 Dumont, P., Vachon, N., Leclerc, J., & Guibert, A. (2002). Intentional introduction of Tench in  
700 Southern Quebec. In R. Claudi, P. Nantel, & E. Muckle-jeffs (Eds.), *Alien invaders in*  
701 *Canada’s waters, wetlands, and forests*. (pp. 169–177). Natural Resources Canada.
- 702 Estoup, A., Ravign, V., Hufbauer, R., Vitalis, R., Gautier, M., & Facon, B. (2016). Is there a  
703 genetic paradox of biological invasion? *Annual Review of Ecology, Evolution, and*  
704 *Systematics*, 47, 51–72.
- 705 Ewels, P., Lundin, S., & Max, K. (2016). MultiQC: summarize analysis results for multiple tools  
706 and samples in a single report. *Bioinformatics*, 32, 3047–3048.
- 707 Excoffier, L., Foll, M., & Petit, R. J. (2009). Genetic consequences of range expansions. *Annual*  
708 *Review of Ecology, Evolution, and Systematics*, 40, 481–501.
- 709 Galpern, P., Peres-neto, P. R., Polfus, J., & Manseau, M. (2014). MEMGENE: *Spatial pattern*  
710 *detection in genetic distance data*. 1116–1120.
- 711 Gandhi, S. R., Anatoly, E., Korolev, K. S., & Gore, J. (2016). Range expansions transition from  
712 pulled to pushed waves as growth becomes more cooperative in an experimental microbial  
713 population. *PNAS*, 113, 6922–6927.
- 714 García-Machado, E., Laporte, E., Normandeau, E., Hernández, C., Côté, G., Paradis, Y., ...  
715 Bernatchez, L. (2021). Fish community shifts along a strong fluvial environmental gradient  
716 revealed by eDNA metabarcoding. *Environmental DNA*, 4, 117–134.
- 717 Garroway, C. J., Bwoman, J., Holloway, G. L., Malcolm, J. Y., & Wilson, P. J. (2011). The  
718 genetic signature of rapid range expansion by flying squirrels in response to contemporary  
719 climate warming. *Global Change Biology*, 17, 1760–1769.
- 720 Goodsman, D. W., Cooke, B., Coltman, D. W., & Lewis, M. A. (2014). The genetic signature of  
721 rapid range expansions: how dispersal, growth and invasion speed impact heterozygosity  
722 and allele surfing. *Theoretical Population Biology*, 98, 1–10.
- 723 Goslee, S. C., & Urban, D. L. (2007). *The ecodist Package for Dissimilarity-based Analysis of*

- 724 *Ecological Data*, 22.
- 725 Grant, E. H. C., Lowe, W. H., & William, F. (2007). Living in the branches□: population  
726 dynamics and ecological processes in dendritic networks. *Ecology Letters*, 10, 165–175.
- 727 Hallatschek, O., & Nelson, D. R. (2008). Gene surfing in expanding populations. *Theoretical*  
728 *Population Biology*, 73, 158–170.
- 729 Hallatschek, Oskar, Hersen, P., Ramanathan, S., & Nelson, D. R. (2007). Genetic drift at  
730 expanding frontiers promotes gene segregation. *PNAS*, 104, 19926–19930.
- 731 Hufbauer, R. A., Facon, B., Ravigne, V., Turgeon, J., Foucaud, J., Lee, C. E., ... Estoup, A.  
732 (2011). Anthropogenically induced adaptation to invade (AIAI): contemporary adaptation to  
733 human-altered habitats within the native range can promote invasions. *Evolutionary*  
734 *Applications*, 5, 89–101.
- 735 Ibrahim, K. M., Nichols, R. A., & Hewitt, G. M. (1996). Spatial patterns of genetic variation  
736 generated by different forms of dispersal during range expansion. *Heredity*, 77, 282–291.
- 737 Jangjoo, M., Matter, S. F., Roland, J., Keyghobadi, N., & Hill, C. (2016). Connectivity rescues  
738 genetic diversity after a demographic bottleneck in a butterfly population network. *PNAS*,  
739 113, 10914–10919.
- 740 Jombart, T, Devillard, S., Dufour, A., & Pontier, D. (2008). *Revealing cryptic spatial patterns in*  
741 *genetic variability by a new multivariate method*. 92–103.
- 742 Jombart, Thibaut, & Ahmed, I. (2011). adegenet 1.3-1: New tools for the analysis of genome-  
743 wide SNP data. *Bioinformatics*, 27, 3070–3071.
- 744 Jombart, Thibaut, Devillard, S., & Balloux, F. (2010). Discriminant analysis of principal  
745 components: a new method for the analysis of genetically structured populations. *BMC*  
746 *Genetics*, 11, 1–15.
- 747 Kan, P., & Cassel-lundhagen, A. (2021). A clue to invasion success: genetic diversity quickly  
748 rebounds after introduction bottlenecks. *Biological Invasions*, 23, 1141–1156.
- 749 Klopstein, S., Currat, M., & Excoffier, L. (2006). The fate of mutations surfing on the wave of a  
750 range expansion. *Molecular Biology and Evolution*, 23, 482–490.
- 751 Kolar, C., & Lodge, D. M. (2002). Ecological predictions and risk assessment for alien fishes in  
752 North America. *Science*, 298, 1233–1236.
- 753 Lajbner, Z., Linhart, O., & Kotlík, P. (2011). Human-aided dispersal has altered but not erased  
754 the phylogeography of the tench. *Evolutionary Applications*, 4, 545–561.
- 755 Landguth, Bearlin, A., Day, C. C., & Dunham, J. (2017). CDMetaPOP: an individual-based, eco-  
756 evolutionary model for spatially explicit simulation of landscape demogenetics. *Methods in*  
757 *Ecology and Evolution*, 8, 4–11.
- 758 Landguth, E., Cushman, S., Schwartz, M., McKelvey, K., Murphy, M., & Luikart, G. (2010).  
759 Quantifying the lag time to detect barriers in landscape genetics. *Molecular Ecology*, 19,  
760 4179–4191.
- 761 Landguth, E., Fedy, B. C., Cance, S. J. O. C., & Garey, A. L. (2012). Effects of sample size,  
762 number of markers, and allelic richness on the detection of spatial genetic pattern.  
763 *Molecular Ecology Resources*, 12, 276–284.
- 764 Leary, S. J. O., Puritz, J. B., Willis, S. C., Hollenbeck, C. M., & Portnoy, D. S. (2018). These  
765 aren't the loci you're looking for: principles of effective SNP filtering for molecular  
766 ecologists. *Molecular Ecology*, 27, 3193–3206.
- 767 Low, G. W., Km, B. C., Irestedt, G. M., Ericson, P. G. P., Tang, G. Y. Q., & Fe, S. W. (2018).  
768 Urban landscape genomics identifies fine-scale gene flow patterns in an avian invasive.  
769 *Heredity*, 120, 138–153.

- 770 Lujan, N. K., Weir, J. T., Noonan, B. P., Lovejoy, N. R., & Mandrak, N. E. (2020). Is Niagara  
771 Falls a barrier to gene flow in riverine fishes? A test using genome-wide SNP data from  
772 seven native species. *Molecular Ecology*, 1–15.
- 773 McKinney, G., Waples, R. K., Seeb, L. W., & Seeb, J. E. (2017). Paralogs are revealed by  
774 proportion of heterozygotes and deviations in read ratios in genotyping-by-sequencing data  
775 from natural populations. *Molecular Ecology Resources*, 17, 656–669.
- 776 Meeus, T. De, & Goudet, J. (2007). A step-by-step tutorial to use HierFstat to analyse  
777 populations hierarchically structured at multiple levels. *Infection, Genetics and Evolution*, 7,  
778 731–735.
- 779 Michaelides, S., While, G. M., Zajac, N., & Sacchi, R. (2016). Loss of genetic diversity and  
780 increased embryonic mortality in non-native lizard populations. *Molecular Ecology*.  
781 <https://doi.org/10.1111/mec.13755>
- 782 Miller, T. E. X., Angert, A. L., Brown, Ca. D., Lee-Yaw, J. A., Lewis, M., Lutscher, F., ...  
783 Williams, J. L. (2020). Eco-evolutionary dynamics of range expansion. *Ecology*, 101, 1–14.
- 784 Morissette, O., Lecomte, F., Vachon, N., Drouin, A., & Sirois, P. (2021). Quantifying migratory  
785 capacity and dispersal of the invasive Tench (*Tinca tinca*) in the St. Lawrence River using  
786 otolith chemistry. *Canadian Journal of Aquatic Sciences*, in press, 1–35.
- 787 Moyle, P. B. (1976). *Inland fishes of California*. Univ of California Press. Univ of California  
788 Press.
- 789 Nei, M., Maruyama, T., & Chakraborty, R. (1975). The bottleneck effect and genetic variability  
790 in populations. *Society for the Study of Evolution*, 29, 1–10.
- 791 Oksanen, J., Blanchet, G., Friendly, M., Kindt, R., Legendre, P., McGlinn, D., ... Wagner, H.  
792 (2019). *vegan: Community Ecology Pack*.
- 793 Paris, J. R., Stevens, J. R., & Catchen, J. M. (2017). Lost in parameter space: a road map for  
794 STACKS. *Methods in Ecology and Evolution*, 8, 1360–1373.
- 795 Peischl, S., Dupanloup, I., Kirkpatrick, M., & Excoffier, L. (2013). On the accumulation of  
796 deleterious mutations during range expansions. *Molecular Ecology*, 22, 5972–5982.
- 797 Peischl, Stephan, & Excoffier, L. (2015). Expansion load  $\square$ : recessive mutations and the role of  
798 standing genetic variation. *Molecular Ecology*, 2084–2094.
- 799 Peter, B. M., & Slatkin, M. (2013). Detecting range expansion from genetic data. *Evolution*, 67,  
800 3274–3289.
- 801 Peter, B. M., & Slatkin, M. (2015). The effective founder effect in a spatially expanding  
802 population. *Evolution*, 721–734.
- 803 Reding, D. M., Cushman, S. A., Gosselink, T. E., & Clark, W. R. (2013). Linking movement  
804 behavior and fine-scale genetic structure to model landscape connectivity for Bobcats (*Lynx*  
805 *rufus*). *Landscape Ecology*, 28, 471–486.
- 806 Rochette, N. C., & Catchen, J. M. (2017). Deriving genotypes from RAD-seq short-read data  
807 using Stacks. *Nature Publishing Group*, 12, 2640–2659.
- 808 Roman, J., & Darling, J. A. (2007). Paradox lost: genetic diversity and the success of aquatic  
809 invasions. *Trends in Ecology and Evolution*, 22. <https://doi.org/10.1016/j.tree.2007.07.002>
- 810 Samarasekera, G. D. N. G., Bartell, N. V., Lindgren, B. S., Cooke, J. E., Davis, C. S., James, P.  
811 M., ... Murray, B. W. (2012). Spatial genetic structure of the mountain pine beetle  
812 (*Dendroctonus ponderosae*) outbreak in western Canada: historical patterns and  
813 contemporary dispersal. *Molecular Ecology*, 21, 2931–2948.
- 814 Shine, R., Brown, G. P., & Phillips, B. L. (2011). An evolutionary process that assembles  
815 phenotypes through space rather than through time. *Proceedings of the National Academy*

- 816 *of Sciences*, 108, 5708–5711.
- 817 Shirk, A J, Group, C. I., & Mountain, R. (2011). *sGD: software for estimating spatially explicit*  
818 *indices of genetic diversity*. 922–934.
- 819 Shirk, Andrew J, Cushman, S. A., Service, U. F., Mountain, R., & Robledo-arnuncio, J. J.  
820 (2014). Spatially-explicit estimation of Wright’s neighborhood size in continuous  
821 populations. *Frontiers in Ecology and Evolution*, 2, 1–12.
- 822 Snyder, M. R., & Stepien, C. A. (2017). Genetic patterns across an invasion’s history: a test of  
823 change versus stasis for the Eurasian round goby in North America. *Molecular Ecology*, 26,  
824 1075–1090.
- 825 Spear, M. J., Walsh, J. R., Ricciardi, A., & Vander Zander, M. J. (2021). The invasion ecology of  
826 sleeper populations: prevalence, persistence, and abrupt shifts. *BioScience*, 71, 357–369.
- 827 Stoffel, M. A., Esser, M., Kardos, M., Humble, E., Nichols, H., David, P., & Hoffman, J. I.  
828 (2016). inbreedR: an R package for the analysis of inbreeding based on genetic markers.  
829 *Methods in Ecology and Evolution*, 7, 1331–1339.
- 830 Swaegers, J., Mergeay, J., Therry, L., Larmuseau, M. H. D., Bonte, D., & Stoks, R. (2013).  
831 Rapid range expansion increases genetic differentiation while causing limited reduction in  
832 genetic diversity in a damselfly. *Heredity*, 111, 422–429.
- 833 Uller, T., & Leimu, R. (2011). Founder events predict changes in genetic diversity during  
834 human-mediated range expansions. *Global Change Biology*, 17, 3478–3485.
- 835 Van Etten, J. (2017). R package gdistance: distances and routes on geographical grids. *Journal of*  
836 *Statistical Software*, 76, 1–21.
- 837 Waples, R. S., & England, P. R. (2011). Estimating contemporary effective population size on  
838 the basis of linkage disequilibrium in the face of migration. *Genetics*, 189, 633–644.
- 839 Waters, J. M., Fraser, C. I., & Hewitt, G. M. (2013). Founder takes all: density-dependent  
840 processes structure biodiversity. *Trends in Ecology & Evolution*, 28, 78–85.
- 841 Watts, P. C., Keat, S., & Thompson, D. J. (2010). Patterns of spatial genetic structure and  
842 diversity at the onset of a rapid range expansion: colonisation of the UK by the small Red-  
843 eyed Damselfly *Erythromma viridulum*. *Biological Invasions*, 12, 3887–3903.
- 844 Williams, J. L., Hufbauer, R. A., & Miller, T. E. X. (2019). How evolution modifies the  
845 variability of range expansion. *Trends in Ecology and Evolution*, 12, 903–913.
- 846 Wright, S. (1946). Isolation by distance under diverse systems of mating. *Genetics*, 31, 39–59.
- 847

848

849 **Data Accessibility Statement**

850 Individual genotype data and associated metadata will be made available on DataDryad upon  
851 acceptance. Code will be uploaded on github.

852

853 **Benefit-sharing statement**

854 A research collaboration was developed between all collaborators, including scientists in  
855 academic and government agencies. Results of the research were shared with the broader  
856 scientific community. The research addresses an important topic for conservation, the rapid  
857 spread of an invasive species of major concern for native species in the St Lawrence River.

858

859 **Author contributions**

860 S.A., J.H., O.M., and T.R. contributed samples and provided constructive feedback on the  
861 manuscript; N.M. and K.J. provided theoretical guidance and feedback on the manuscript; T.B.  
862 performed the research, analyzed the data, and wrote the manuscript.

863

864 Figure 1: Map of the focal area in eastern North America and locations of samples (red triangles)  
865 of the contemporary population included in the genetic analysis of Tench (*Tinca tinca*).  
866

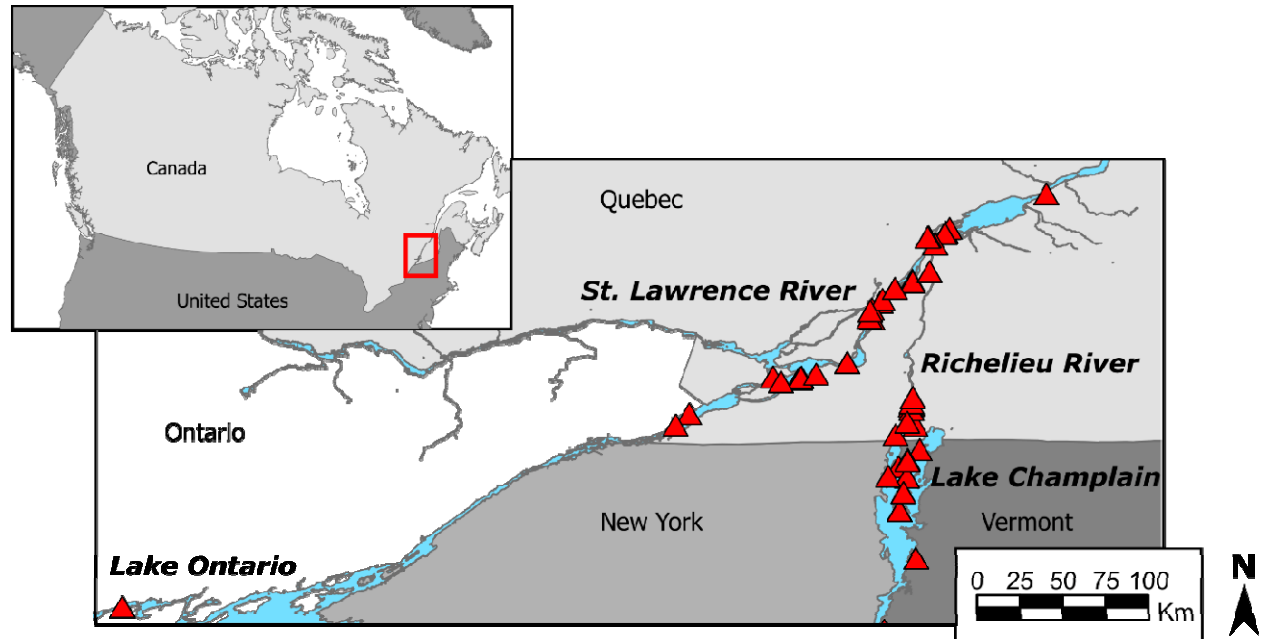

867  
868

869 Figure 2: Schematic representation of the two groups of scenarios for the introduction history of  
 870 Tench (*Tinca tinca*) in eastern North America tested with DIYABC Random Forest. N represents  
 871 the effective population size in the ancestral, bottleneck, established, and contemporary  
 872 population; t represents timing events, including sampling events (in **bold\***: t0= contemporary,  
 873 tb=original population), population expansion between the contemporary and the ancestral  
 874 population (ta) and between the bottleneck and the ancestral population (tc), and population  
 875 bottleneck (td in group 2 of scenarios).  
 876

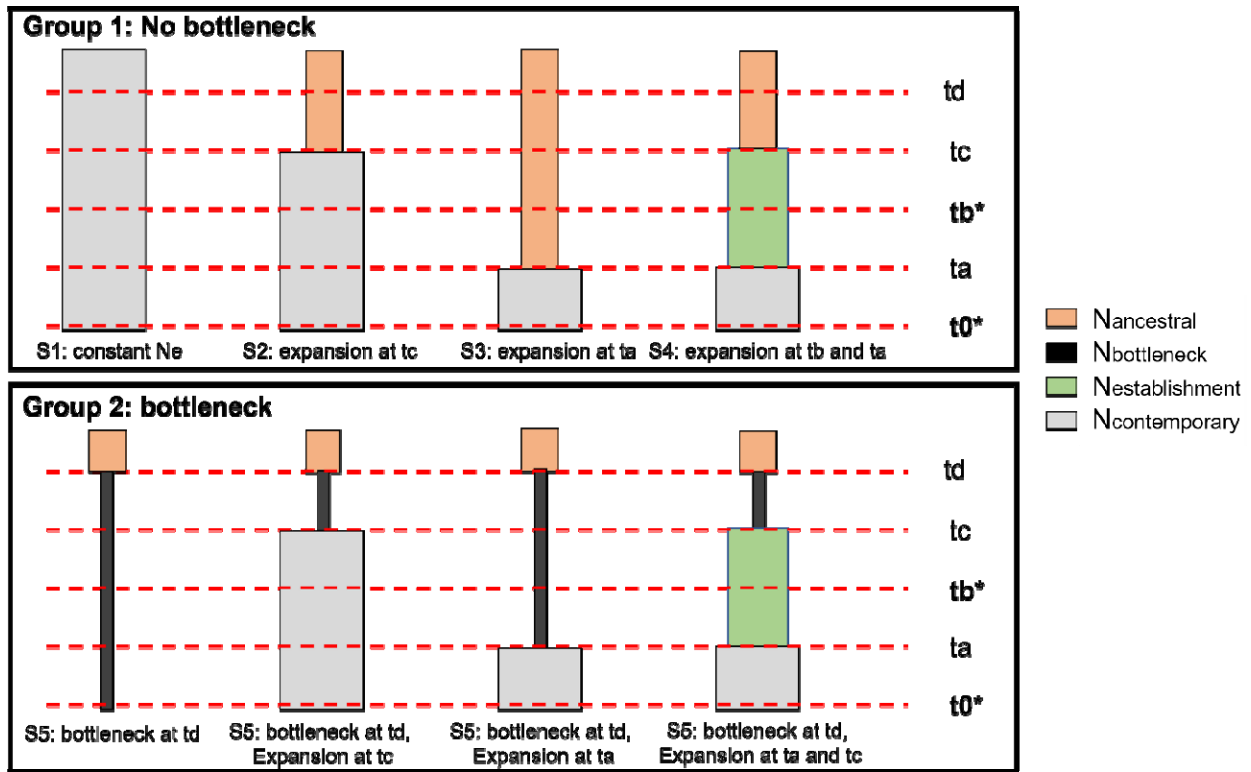

877

878 Figure 3: Temporal changes in genetic diversity of Tench (*Tinca tinca*) in eastern North America  
879 at the population- ( $H_o$ ,  $H_s$ ) and the individual-level (IR, MLH). The asterisks highlight  
880 statistically significant differences ( $p < 0.05$ ) in average metric values between the contemporary  
881 and the original samples.  
882

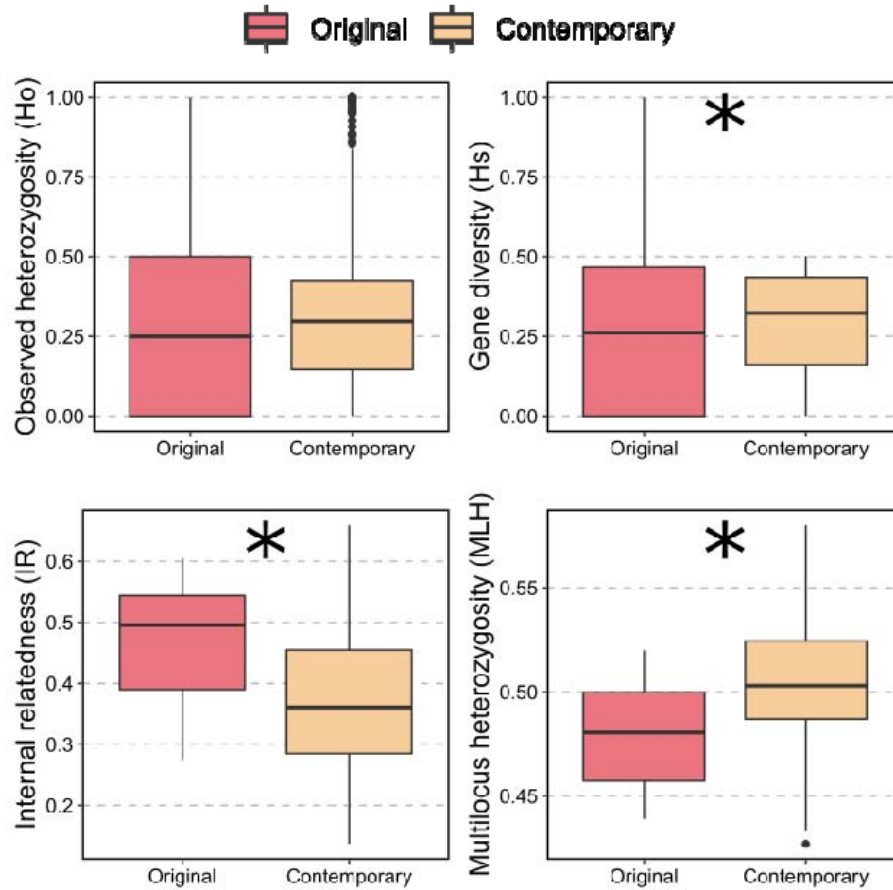

883



884 Figure 4: Spatiotemporal patterns in genetic structuring for Tench (*Tinca tinca*) in eastern North  
885 America was explored using several analyses. a) Principal Component Analysis showing patterns  
886 of genetic diversity distributed along PC axes 1 and 2 and the centroids of sampling locations;  
887 Changes in BIC values K-mean clustering to guide de-novo Discriminant Analysis of Principal  
888 Components.  
889

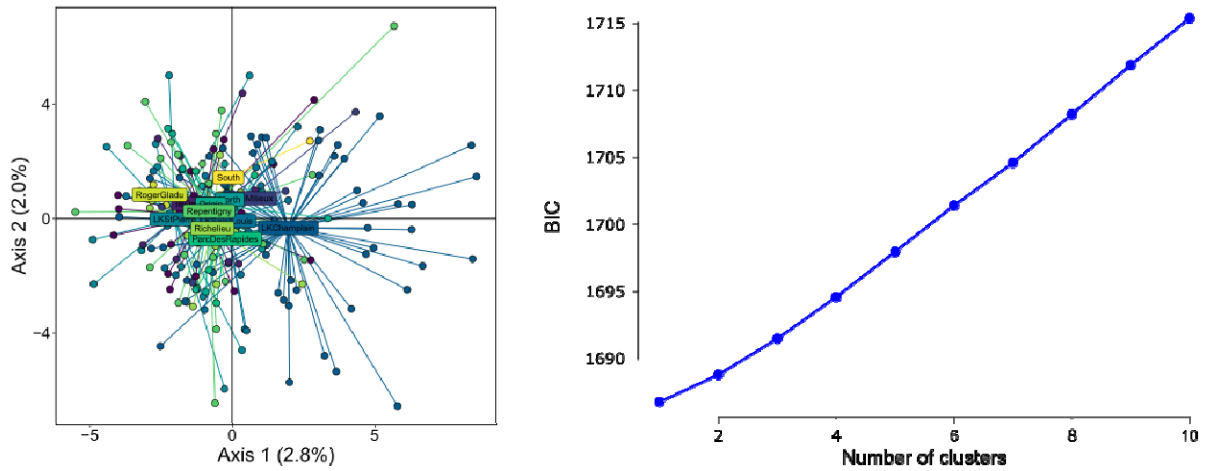

890  
891  
892

893 Figure 5: sPCA and MEMgene highlighted contrasted patterns of population sub-structuring of  
894 Tench (*Tinca tinca*) in eastern North America. Squares (sPCA) and circles (MEMgene) represent  
895 samples. To interpret the strength of genetic differentiation, square size is proportional to the  
896 eigenvalue score and colour indicates the sign: large white square are very differentiated from  
897 large black square, and small squares are less differentiated. To facilitate the visual interpretation  
898 of the plots, The Lake Ontario sample was removed.  
899

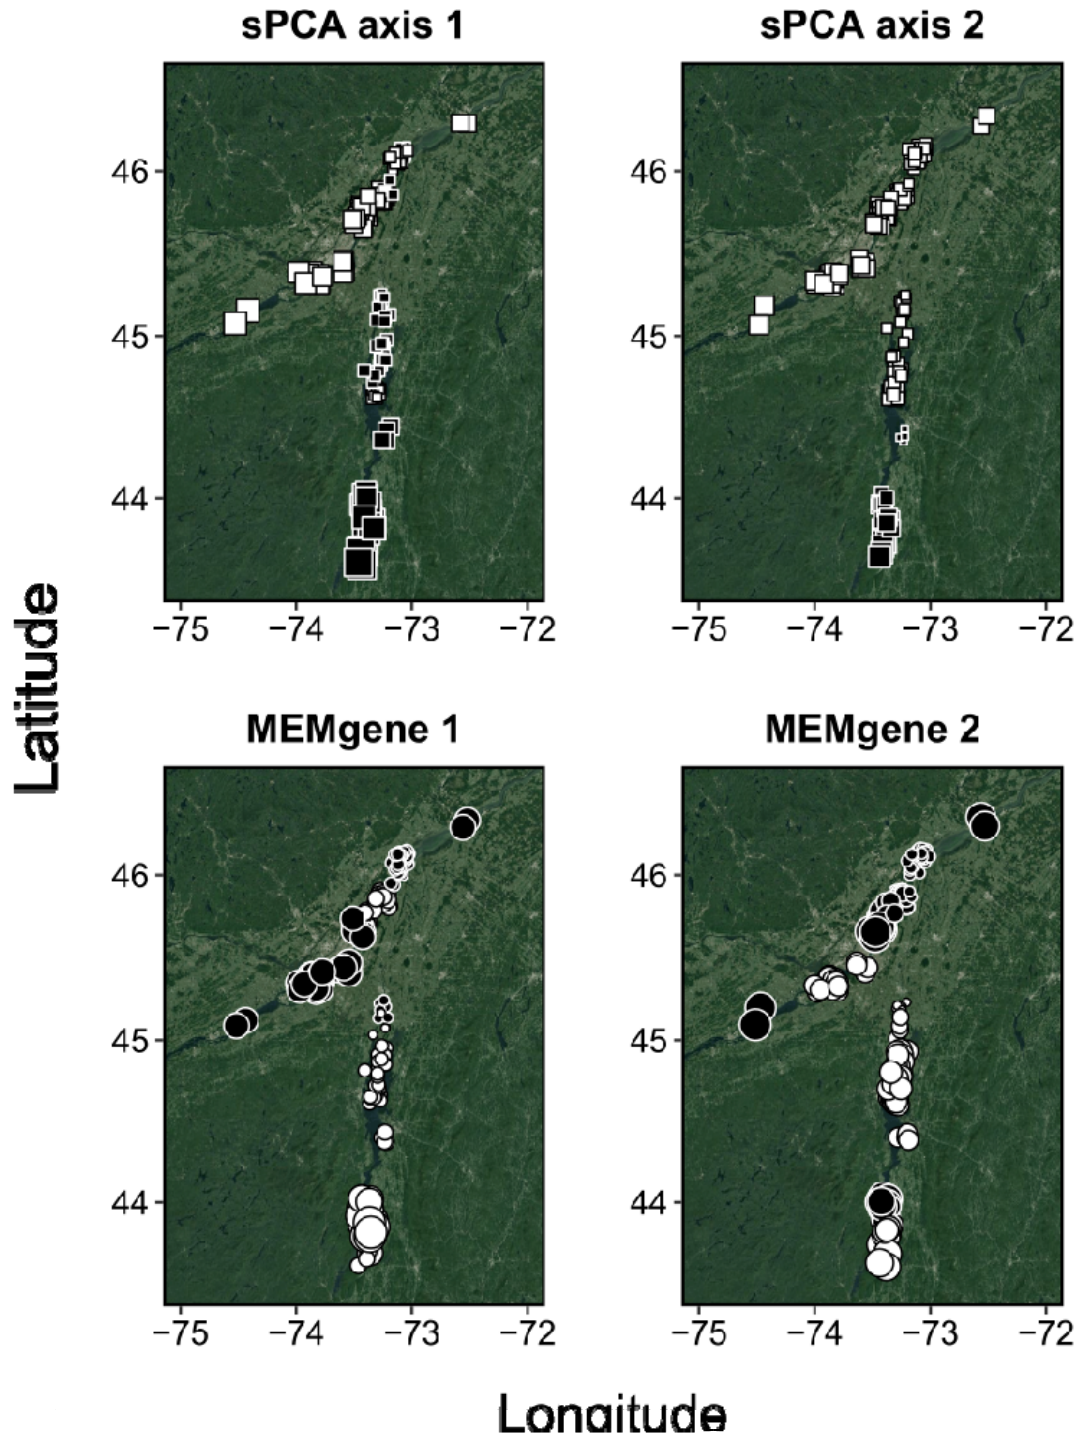

900

901 Figure 6: Correlogram showing spatial autocorrelation in genetic distance across a range of  
902 distance classes between Tench (*Tinca tinca*) individuals in eastern North America. The genetic  
903 neighbourhood is defined as the largest distance class with a statistically significant (indicated in  
904 black) positive correlation.  
905

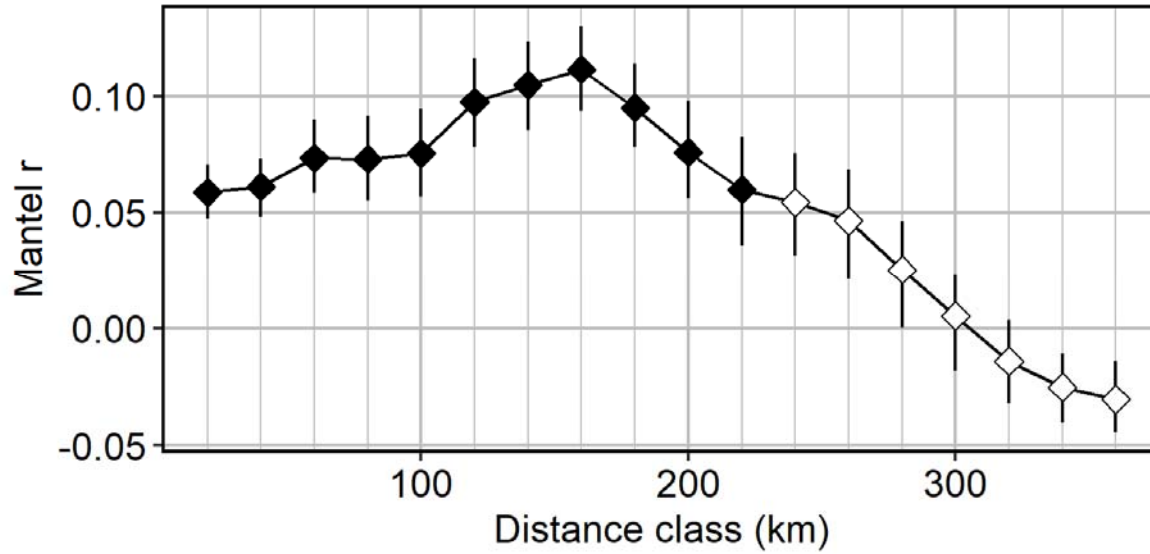

906

907 Figure 7: Spatial patterns of genetic diversity for the invasive population of Tench (*Tinca tinca*)  
908 in eastern North America. Genetic diversity was calculated at the individual (internal relatedness  
909 IR; multilocus heterozygosity MLH) and the genetic neighbourhood size level (inbreeding Fis;  
910 observed heterozygosity Ho; allelic richness Ar).  
911

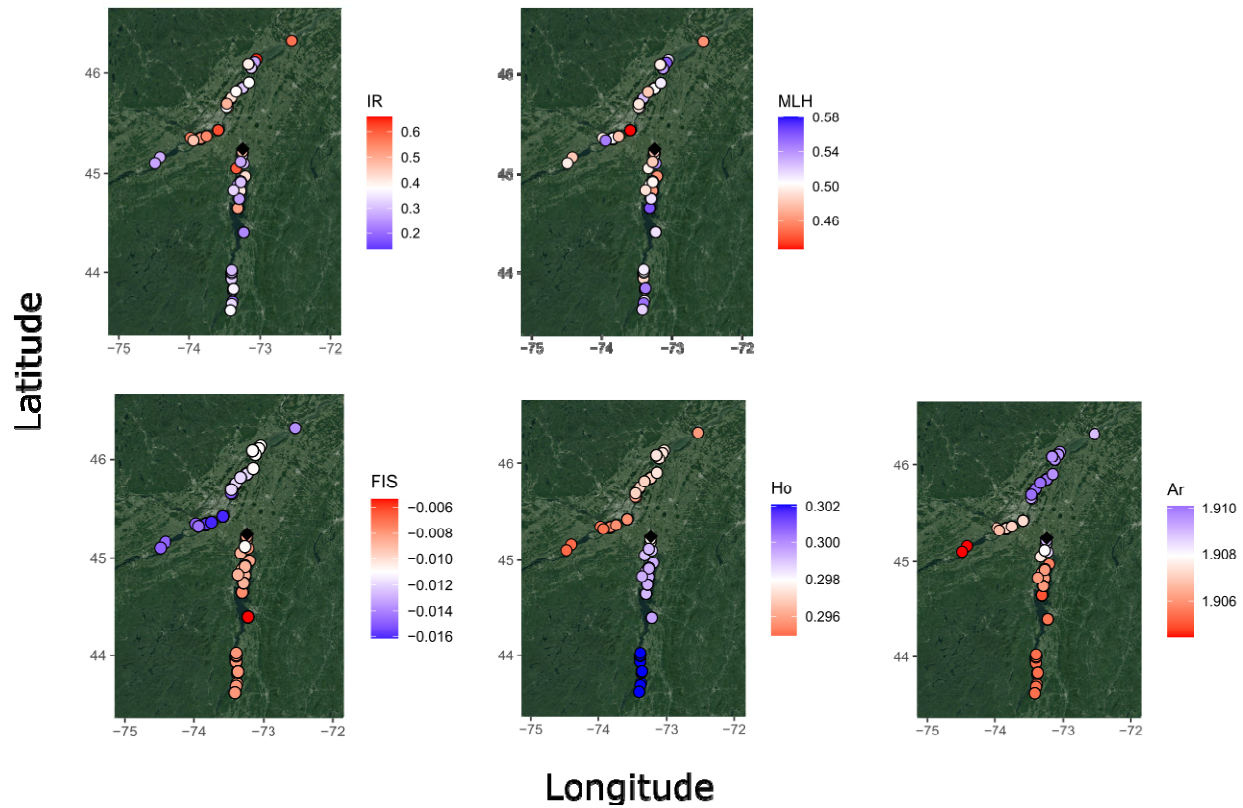

912  
913

914 Figure S1: Investigation of the effect of the distance allowed between two stacks ( $M$ ) and the  
 915 number of mismatches in the catalog ( $n$ ) in de-novo stacks assembly for Tench (*Tinca tinca*) in  
 916 eastern North America on: a) the number of assembled loci present in  $>70\%$  of the samples, b)  
 917 the number of polymorphic loci, c) the number of SNPs, d) the number of SNPs per loci, and e)  
 918 the proportion of potentially erroneous SNPs. For a given  $n$ , we observed that the number of  
 919 polymorphic loci was the highest for  $M2$  and  $M3$  and the number of SNPs for  $M3$ . However,  
 920 with  $M3$ , we observed a greater proportion of potentially erroneous SNPs and noted that there  
 921 were more loci with high numbers of SNPs, suggesting that some loci might erroneously merge  
 922 together for higher values of  $M$ . For a given  $M$ , the number of polymorphic loci and SNPs were  
 923 greater for  $n=M-1$ ; however, this parameter value was also associated with greater proportions of  
 924 potentially erroneous SNPs and loci with higher numbers of SNPs. Given that we expect fixed  
 925 differences to be rare in our dataset, we chose to select  $n=M$ . Accordingly, we identified  $M2$  and  
 926  $n2$  as the optimal parameters for our dataset.  
 927

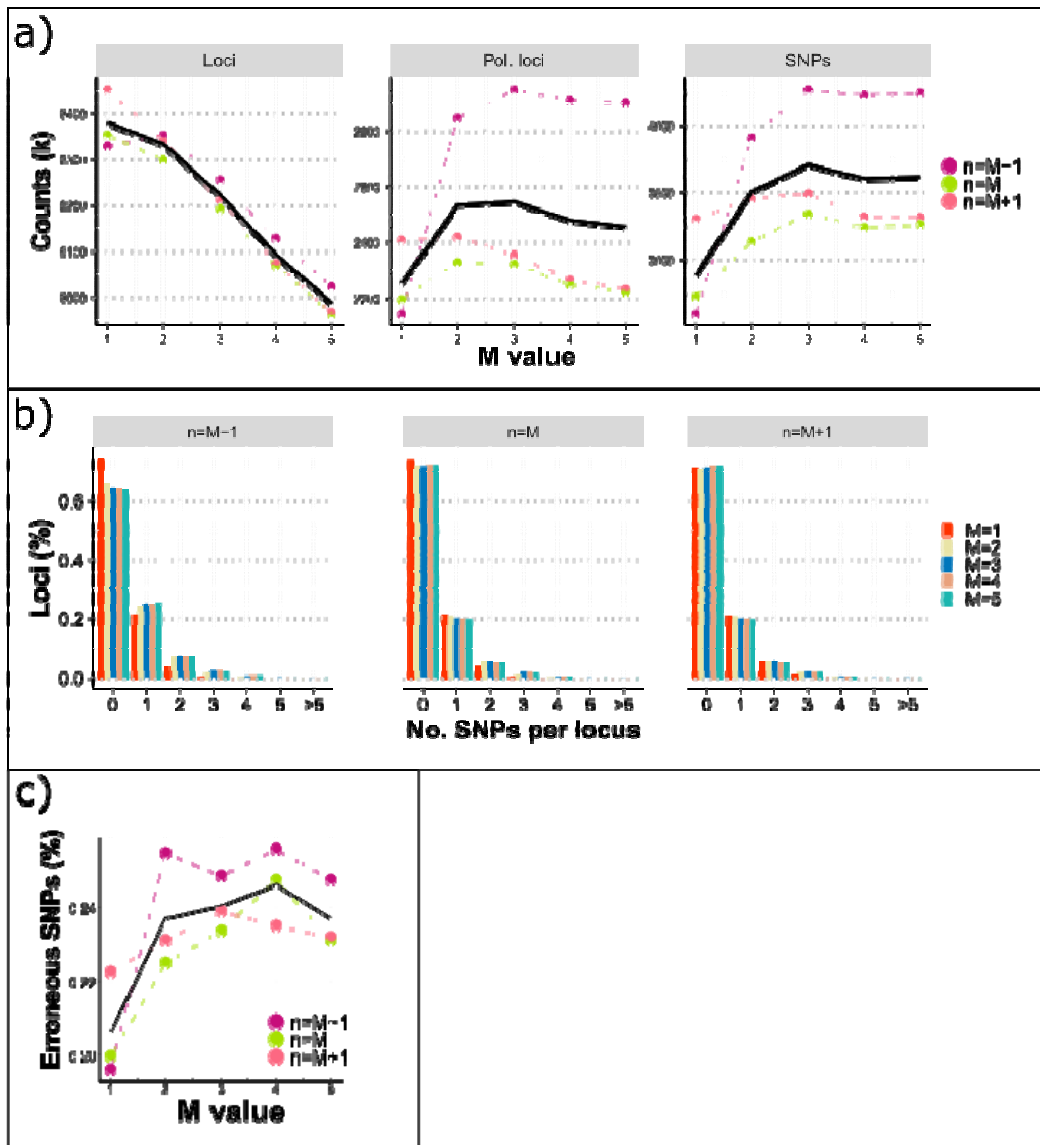

928

929 Fig. S2: Variation in effective population size estimates from the linkage disequilibrium method  
930 ( $N_{eLD}$ ) as a function of excluding rare alleles ( $P_{crit}$ ) for Tench (*Tinca tinca*) in eastern North  
931 America. Point estimates and associated 95% jackknife confidence intervals are shown.  
932

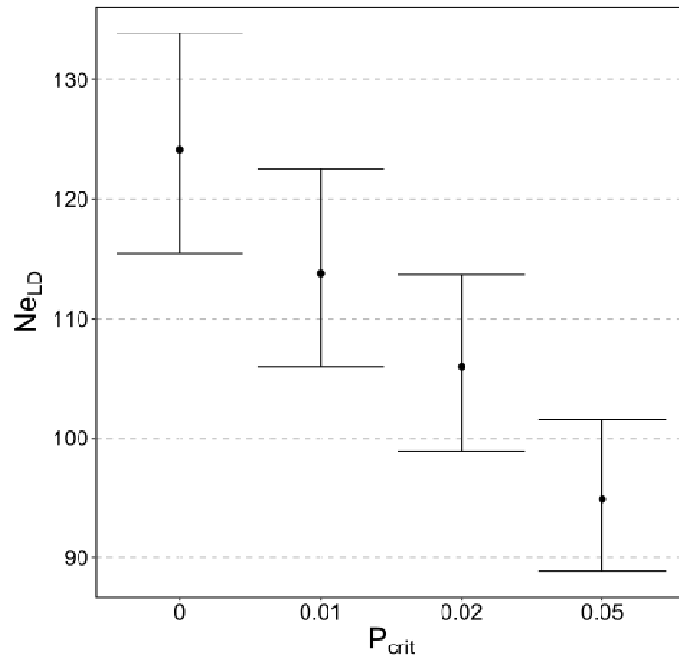

933  
934

935 Fig S3: Randomization tests histogram for internal relatedness (IR) and multilocus  
936 heterozygosity (MLH) for differences between the original and contemporary invasive  
937 population of Tench in eastern North America. Red lines indicate the range within 95% of the  
938 values fall, and the dotted black line indicate the observed mean difference between the two  
939 populations.  
940

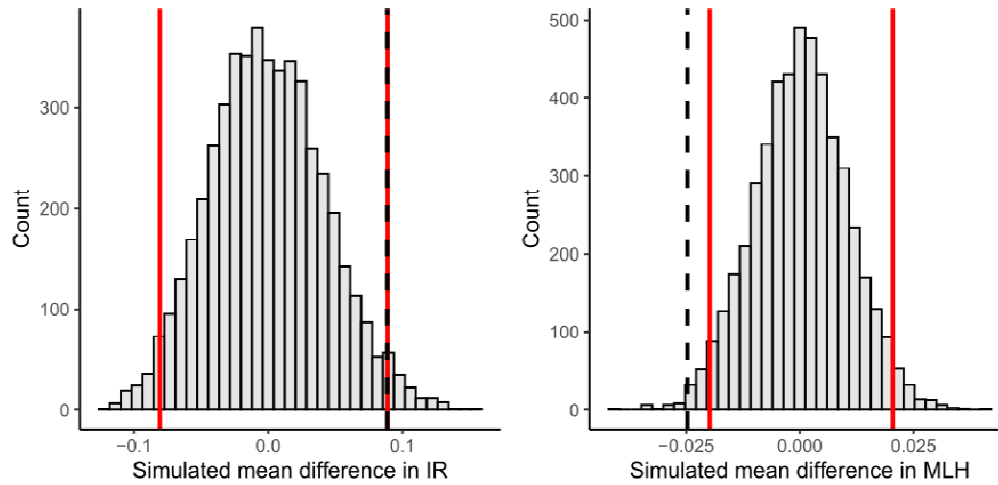

941  
942

943 Fig S4: Projection of the observed Tench data on a single LDA axis for the group-level analysis  
944 (upper figure) and two LDA axes for the scenario-level analysis (lower figure). The two groups  
945 represent scenarios without (group of scenarios 1, scenario 1:4) and with bottleneck (group of  
946 scenarios 2, scenario 5:6).

947  
948

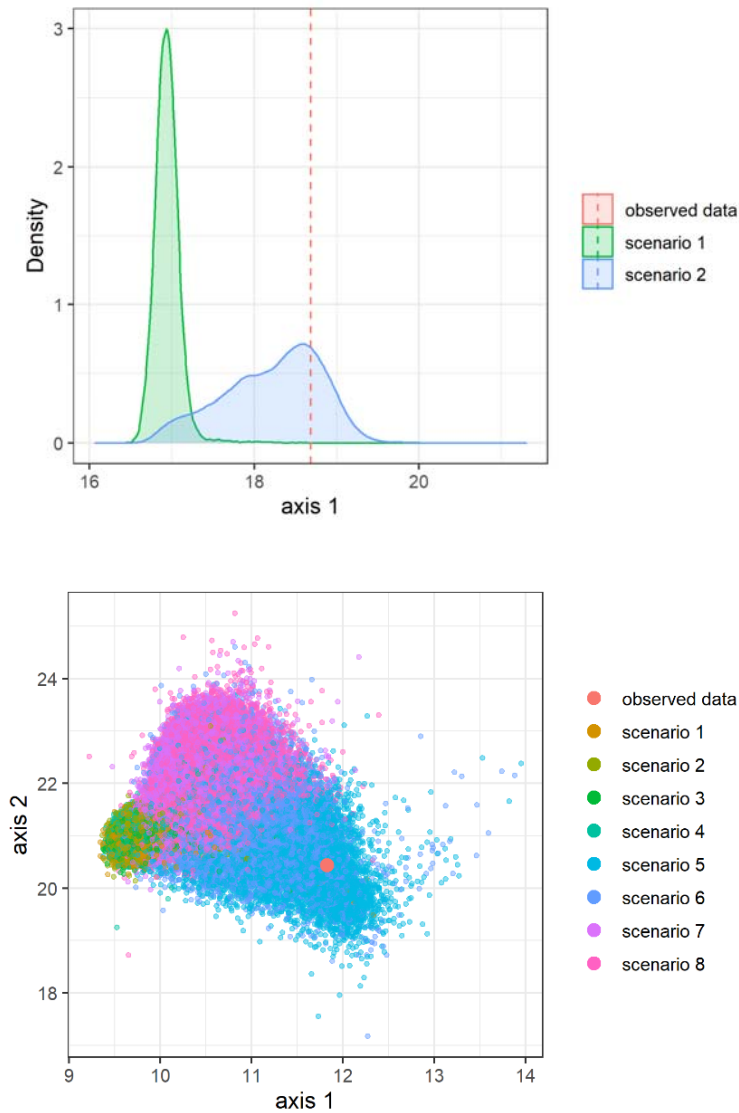

949  
950
